# Supplementary material for: JAK Inhibition Differentially Affects NK Cell and ILC1 Homeostasis
Source: Front Immunol. 2019 Dec 19;10:2972. doi: 10.3389/fimmu.2019.02972 (PMC6930870; doi:10.3389/fimmu.2019.02972)
Supplement: Supplementary file 2 [file Table_2.XLSX]

## Sheet: Expressed genes
Expressed genes in NK cells, log2 RPKM > 1
RPKM values are log2 transformed
Gene Symbol	Tofacitinib	Vehicle	pvalue	FC
F2rl2	1.46232	4.13554	0.00594299	0.156777
Gzmb	6.07365	8.65543	0.0326632	0.167035
Bcl2	3.47804	5.90709	0.0180246	0.185687
Bspry	1.0888	3.43729	0.016118	0.196351
Serpina3f	2.1529	4.36761	0.0021472	0.215431
Cdh17	-1.08029	1.11513	0.0156318	0.218329
Pim2	3.90823	6.04109	0.00676939	0.228005
Ccnb2	-0.555657	1.48555	0.00370931	0.24296
Tasp1	2.54439	4.55309	0.021029	0.248497
Cdca7	0.396265	2.38833	0.00633757	0.251379
Cdk6	-0.157837	1.8122	0.00747309	0.255246
Serpina3g	5.52572	7.4887	0.0102024	0.256498
Pclaf	0.552339	2.51145	0.000698822	0.257187
Cish	3.23438	5.17321	0.0320987	0.260827
Ifi44	-0.752404	1.18052	0.0168266	0.261897
Ifi27l2a	0.60196	2.53022	0.000981259	0.262745
Slc7a5	0.916756	2.84221	0.0208947	0.263257
Hbegf	0.599442	2.5096	0.0430538	0.266063
Capg	3.36846	5.26554	0.0131171	0.268487
Srm	2.01109	3.90692	0.0124294	0.268719
Usp18	-0.310295	1.57613	0.00504757	0.270477
E2f1	0.799172	2.65223	0.0263315	0.276805
Chek1	-0.814866	1.0211	0.0387403	0.280103
Ctps	0.639954	2.4224	0.0249567	0.290691
Rrm2	1.36824	3.09677	0.0107795	0.301759
Serpina3h	0.0734761	1.7843	0.363399	0.305486
Tmem163	0.250896	1.94357	0.0327373	0.309354
Stmn1	3.85054	5.50024	0.0106318	0.318707
Cxcl10	0.0117837	1.63802	0.0361977	0.323932
Nek6	0.29028	1.90286	0.0167124	0.327013
Fignl1	-0.379451	1.22625	0.00715373	0.328577
Slc16a10	1.13262	2.72874	0.00769077	0.330766
Apex1	1.64107	3.23626	0.0269458	0.330979
Prr5l	-0.441852	1.14789	0.0104677	0.33223
Rrp12	0.537875	2.10016	0.0203861	0.338615
Mettl1	0.799504	2.35701	0.0235976	0.339738
Tsr1	2.24898	3.79676	0.0436731	0.342036
Top2a	1.2876	2.83001	0.00982677	0.343313
Ccna2	-0.493653	1.04487	0.0193663	0.344238
Nucb1	5.32529	6.86207	0.0601707	0.344654
Ccnd2	4.94502	6.47719	0.013107	0.345758
1700017B05Rik	1.01303	2.53676	0.0344086	0.347784
Ifit1	0.163929	1.68491	0.0235626	0.348448
Mx1	-0.510299	1.00302	0.00426163	0.350305
Uhrf1	0.849412	2.36273	0.050967	0.350305
Mki67	1.02653	2.53228	0.0458591	0.352145
Kif11	-0.208957	1.28299	0.0198786	0.355532
Ppp1r14b	3.8619	5.34731	0.0318534	0.357147
Klrb1a	4.57024	6.04598	0.0169712	0.35955
Fabp5	0.0759235	1.54964	0.0360113	0.360052
Rexo5	1.62796	3.0821	0.0272771	0.364972
Rnf157	0.0853654	1.51227	0.0386071	0.371927
Stc2	1.1236	2.54267	0.0633456	0.373954
Trmt61a	1.04591	2.46089	0.0289386	0.375017
Myc	2.90605	4.29924	0.0776158	0.380724
Ppa1	2.45409	3.83312	0.0384207	0.384478
Gins2	0.980138	2.35163	0.131584	0.38649
Mlkl	0.0691561	1.42803	0.0276564	0.389886
Spc24	1.27288	2.62962	0.0767093	0.390464
Timm9	1.28515	2.61427	0.0320825	0.398008
Nme1	4.73077	6.03982	0.0472175	0.403587
Gpatch4	1.2777	2.57408	0.0600221	0.407146
Pprc1	0.980925	2.26533	0.050433	0.410539
Pusl1	0.851691	2.12758	0.0301111	0.412971
Cks1b	1.83378	3.10881	0.00961071	0.413216
Etv3	3.69053	4.95879	0.0773247	0.415162
Isg20	0.169609	1.43745	0.0131575	0.415281
Socs2	3.65951	4.92663	0.0618864	0.415488
Epcam	0.769362	2.03494	0.0020467	0.415932
Galk1	1.6354	2.89128	0.0629662	0.41874
Spred1	0.0411068	1.28058	0.0354941	0.423528
Ydjc	0.718424	1.93547	0.120733	0.430161
Ipo4	1.25502	2.47065	0.0261133	0.430584
Nle1	1.89807	3.10658	0.0268286	0.432714
Bysl	1.63474	2.8321	0.0387738	0.436073
Timm8a1	1.05376	2.25031	0.0857492	0.436318
Pole	0.344446	1.53448	0.0231911	0.438292
Wdr4	1.05288	2.23819	0.038399	0.439731
Grwd1	1.64465	2.82816	0.152721	0.440277
Mrto4	2.708	3.88555	0.0245252	0.442103
E2f3	0.27174	1.44521	0.0233109	0.443355
Isg15	3.30805	4.48128	0.033505	0.44343
Lilrb4a	4.53653	5.70746	0.0515143	0.444135
Cmpk2	0.274041	1.44364	0.0904085	0.444544
Otos	0.288545	1.45785	0.0359398	0.444637
Oasl1	0.916703	2.08253	0.0718807	0.445708
Pus1	2.71485	3.88022	0.0377461	0.44585
Timm10	2.05407	3.21694	0.061278	0.446623
Tpx2	0.286742	1.43902	0.123682	0.449916
Kcnk7	0.149932	1.2987	0.089887	0.451011
Rad51	0.954919	2.10138	0.0438827	0.451733
Tcf19	2.05102	3.17114	0.173556	0.460055
Ifit3	0.584862	1.69256	0.00433795	0.464033
Rasd2	1.01358	2.11492	0.00762668	0.466085
Eno1	5.37202	6.46339	0.417446	0.469316
St14	2.03841	3.12408	0.109007	0.471173
Gart	2.58114	3.66666	0.0838537	0.471222
Gm38431	0.446304	1.52249	0.323775	0.47428
Snhg15	2.54944	3.6163	0.0827576	0.477359
C1qbp	3.87093	4.93403	0.0584646	0.478602
Bcl2l1	3.55846	4.62075	0.0471094	0.478872
Ifi44l	0.418992	1.47821	0.13857	0.479892
Csf2	1.41961	2.47824	0.089655	0.480085
Tk1	1.65881	2.71262	0.0513935	0.481695
Spred2	1.53474	2.58801	0.113395	0.481876
Gbp10	2.10045	3.15297	0.00541109	0.482124
Slc7a1	1.45362	2.50123	0.0598865	0.483769
Cdca3	0.00214824	1.04797	0.0436544	0.484368
Chaf1a	1.14635	2.18541	0.0484167	0.486646
C1qtnf6	2.99692	4.03409	0.0743459	0.487282
Cd3eap	1.40098	2.43545	0.0734428	0.488195
Rcl1	2.02534	3.05948	0.0526588	0.488304
F2r	5.0301	6.05741	0.0928031	0.490625
Gzma	9.0358	10.062	0.20766	0.491018
Aen	1.18832	2.20972	0.0409075	0.492641
Socs1	4.56225	5.57967	0.22536	0.493998
Ung	1.6735	2.6902	0.0316736	0.494245
Lss	1.25894	2.2682	0.104039	0.496799
Cdca8	0.231601	1.23386	0.0617052	0.499219
Rrp15	2.6632	3.66405	0.0919099	0.499704
Slc19a1	0.794742	1.79545	0.214592	0.499754
Rtp4	2.98352	3.97712	0.0778072	0.502222
Mcm2	3.73113	4.71659	0.0999083	0.505067
Pik3r5	3.70031	4.68448	0.0470486	0.505519
Zfp593	1.58847	2.57145	0.170124	0.505934
Ccnd3	6.2376	7.22	0.170133	0.506135
Rgl1	0.480485	1.4612	0.0255573	0.506728
Pus7	0.291148	1.27153	0.0336994	0.506844
Mybbp1a	3.61086	4.58411	0.136864	0.509355
Mthfd1	2.49021	3.45993	0.0971783	0.510605
Atic	2.88248	3.85189	0.084696	0.510715
Rasgrp1	4.44583	5.4093	0.0939218	0.512825
Tuft1	0.328607	1.28551	0.093265	0.51516
Ptpn9	3.31514	4.27177	0.169353	0.51526
Il12rb1	4.15582	5.10704	0.0527306	0.517197
Ahr	2.54638	3.49606	0.0894465	0.517747
Gadd45g	4.59468	5.53703	0.0455387	0.520384
Nhp2	3.74737	4.6876	0.146487	0.521151
Pdcd1	1.84434	2.78442	0.00843318	0.521204
P2rx7	3.12275	4.05053	0.10365	0.525669
Tfrc	1.33131	2.25748	0.0836626	0.526255
Tnfrsf9	3.62443	4.54288	0.0106212	0.52908
Ccdc86	1.33874	2.25295	0.075387	0.530634
Prmt3	2.76678	3.67898	0.104579	0.531375
Adam19	3.12761	4.0391	0.121328	0.531635
Ranbp1	5.07641	5.98715	0.0843988	0.531913
Epop	2.00845	2.91882	0.183013	0.532048
Lgals3	6.16406	7.07378	0.238944	0.532288
Mcm3	3.69964	4.60459	0.0976364	0.534049
Ears2	0.145481	1.04861	0.0155909	0.534725
Rrp9	3.6189	4.52107	0.127023	0.535081
Lppos	2.62722	3.5282	0.1308	0.535522
Dph1	1.09281	1.99137	0.174042	0.536422
Tma16	0.880238	1.77747	0.188686	0.536914
Uqcc2	4.48999	5.38312	0.0655755	0.538443
Hspa9	4.30005	5.18895	0.177478	0.540026
Abcb9	3.75492	4.64255	0.102199	0.540502
Mcm6	3.21402	4.09754	0.163467	0.542044
Lgals3bp	5.20026	6.08293	0.137232	0.542362
Mthfd2	1.57922	2.45899	0.158176	0.543455
Prag1	3.46053	4.33944	0.100037	0.54378
AI661453	1.13101	2.00494	0.193052	0.545656
Oas1a	2.46426	3.33399	0.159644	0.547252
Ddx21	4.32153	5.19094	0.152691	0.547369
Ppp1r3b	1.94471	2.81405	0.0730803	0.547397
Wee1	0.933152	1.80239	0.115297	0.547437
Myl4	0.362988	1.23004	0.142619	0.548267
Tspan4	0.828977	1.69241	0.0724983	0.549644
Kcnk5	2.2745	3.13603	0.185014	0.55037
Tdrd3	1.50093	2.36073	0.0880645	0.551031
Prmt7	1.64846	2.50763	0.170468	0.551267
Polr1b	1.7513	2.60664	0.0372486	0.552736
Mvd	1.96547	2.81781	0.13535	0.553887
Dusp5	4.38608	5.23736	0.406859	0.554293
Ncapg2	0.381358	1.2292	0.0536826	0.555614
Nop2	2.45673	3.30402	0.117777	0.555827
Fbl	5.00629	5.85156	0.143637	0.556607
Wwc2	0.289843	1.13493	0.048545	0.556679
Rcc1	1.14702	1.98304	0.14248	0.560185
Tfdp1	2.75447	3.59036	0.115083	0.560235
Rprl3	0.334278	1.16945	0.845883	0.560518
Ptrh1	0.385683	1.22013	0.220386	0.560799
Pwp2	1.87489	2.70804	0.185008	0.561304
Noc2l	4.04257	4.87326	0.154296	0.56226
Ifrd2	2.24065	3.07131	0.144867	0.562268
Ppan	3.03262	3.85982	0.163388	0.563622
Osm	1.47014	2.29588	0.312546	0.564191
Gm5914	0.535365	1.35733	0.0756565	0.565671
Gcm1	0.378762	1.19309	0.49411	0.568673
Igsf5	1.16712	1.98063	0.102144	0.568999
Fdx1l	2.50182	3.31422	0.0352179	0.569437
Nop58	4.02216	4.82901	0.180908	0.571631
Gins1	1.07848	1.8844	0.274509	0.571999
Ptger4	4.46008	5.26573	0.203038	0.572103
Urb2	1.13777	1.9433	0.136924	0.572152
Camkk1	1.15497	1.95936	0.0992927	0.572603
Bid	3.07643	3.8808	0.175867	0.572613
Dhx58	1.41175	2.21518	0.0381543	0.572984
Ndufs5	2.65991	3.46296	0.594711	0.573138
Reep5	4.57149	5.37184	0.204851	0.57421
Pno1	2.40869	3.20671	0.162553	0.57514
Hgh1	2.38107	3.1777	0.0637742	0.575692
Sdad1	1.54432	2.3402	0.0844292	0.575993
Hells	2.02915	2.82464	0.136642	0.576148
Zfp367	1.87587	2.67009	0.130086	0.576656
Enoph1	1.83336	2.62615	0.132652	0.577226
Atad3a	2.6073	3.40006	0.0868785	0.577238
Chst2	1.06243	1.85128	0.0273774	0.578804
Rps15a-ps4	3.73436	4.52093	0.307744	0.579723
Rrs1	2.92963	3.71504	0.181075	0.58019
Mrps10	2.55856	3.34266	0.154093	0.580715
Mapkapk3	3.43514	4.21865	0.1849	0.580954
Crip1	6.62609	7.40884	0.190403	0.581258
Gngt2	2.23041	3.01224	0.110716	0.58163
Irf9	3.45436	4.23292	0.0671099	0.582946
Bst2	4.24661	5.0216	0.131941	0.58439
Dcaf1	2.34486	3.11935	0.159384	0.584594
Mettl13	0.943146	1.71735	0.158814	0.584712
Ldlr	0.938836	1.71192	0.327405	0.585167
Uchl3	3.17006	3.94253	0.0894681	0.585412
1810006J02Rik	1.70548	2.4759	0.0655703	0.586243
Dctpp1	2.70265	3.47202	0.19566	0.586675
Rpf2	1.87563	2.64459	0.111981	0.586838
Stat1	4.56466	5.32866	0.063511	0.588863
Cad	3.0935	3.85713	0.188391	0.589011
Lig1	2.53926	3.30249	0.214585	0.589174
Fcrls	1.39068	2.15377	0.187887	0.589235
Dusp6	4.19507	4.95725	0.116508	0.589605
Oas3	2.30169	3.0623	0.0739962	0.590244
Emid1	4.21501	4.97484	0.114755	0.590569
Spin2c	3.38702	4.14684	0.0595278	0.590571
Rmi2	1.71319	2.4718	0.0590789	0.591064
Ccdc136	2.71815	3.47589	0.14252	0.591421
Tnfsf8	3.07203	3.82936	0.142545	0.591587
Sh2d1b1	2.08317	2.84032	0.0703235	0.591661
Adap1	1.44352	2.20039	0.278805	0.591779
Ankrd28	1.13233	1.88846	0.131172	0.592082
Ltv1	2.94885	3.70493	0.156544	0.592106
Gem	5.82479	6.5799	0.10971	0.592502
Sema6d	1.57246	2.32739	0.0552391	0.592573
Telo2	1.8242	2.57851	0.0719616	0.592827
B3galt6	0.372585	1.12465	0.0867245	0.593752
Nop16	1.98727	2.73923	0.220196	0.593798
BC048403	0.891633	1.64298	0.0801421	0.594047
Gnl3	2.92275	3.67317	0.185822	0.594432
Dclk2	2.22325	2.97336	0.0787588	0.59456
Tipin	2.70301	3.45145	0.225687	0.595246
4933404O12Rik	0.419962	1.16826	0.0707975	0.595307
Cep57	3.29007	4.0369	0.228498	0.595911
Cdc20	1.52903	2.27424	0.0913412	0.596582
Ipo5	3.05865	3.80359	0.190489	0.596692
Pde11a	0.985084	1.72932	0.00794756	0.596984
Psat1	2.80501	3.54457	0.177492	0.598922
Clnk	4.35494	5.09419	0.244177	0.599052
Rhbdd3	0.601169	1.33784	0.132085	0.600122
Polr3e	1.6998	2.43586	0.157402	0.600376
Gbp6	2.95962	3.69527	0.0646912	0.600548
Plpp2	0.739912	1.47464	0.229638	0.60093
Cdc45	0.883669	1.6157	0.162924	0.602057
Snhg17	1.72496	2.45557	0.144512	0.60265
Gzmc	3.32	4.04827	0.123937	0.603624
Gstm5	0.372108	1.10017	0.308106	0.603712
Sqle	0.822159	1.54972	0.193229	0.603924
Tfap4	0.844477	1.5698	0.262912	0.604861
Gcsh	1.99753	2.72261	0.303375	0.604961
Fam174b	1.72626	2.45091	0.181226	0.605145
Lap3	2.13253	2.85623	0.202216	0.605543
Plk3	2.78849	3.5105	0.156612	0.606251
Egr2	1.304	2.02478	0.141895	0.60677
Ifi35	4.4397	5.16045	0.139061	0.606781
Kat2a	2.71738	3.43788	0.151816	0.606884
Mrpl12	4.26177	4.98223	0.193926	0.606906
2310009B15Rik	1.07885	1.79718	0.0320801	0.6078
Ccr2	5.39995	6.11757	0.196047	0.608104
Ccne1	1.51003	2.2267	0.246121	0.608501
Chaf1b	1.51741	2.233	0.164098	0.608955
Paqr4	0.823303	1.53824	0.180662	0.60923
Cycs	3.69411	4.40879	0.079193	0.609339
Eif4a1	6.58815	7.30235	0.236839	0.609541
Inpp4b	4.1998	4.91371	0.148201	0.609667
Lta	0.667636	1.37931	0.0584842	0.610611
Tacc3	1.45954	2.16738	0.0284446	0.612234
Tbrg4	2.85086	3.55862	0.230628	0.612273
Utp18	2.76653	3.47351	0.173622	0.612602
Itih5	2.90598	3.61239	0.154671	0.612842
Dkc1	3.36223	4.06837	0.085651	0.61296
Ngly1	3.69456	4.4005	0.20216	0.613046
Mrps18b	2.345	3.05062	0.223645	0.613181
Tent4a	1.50852	2.21261	0.187164	0.613829
Jaml	3.14728	3.85029	0.282284	0.614292
Phgdh	4.00725	4.70647	0.136254	0.615905
Ltb4r1	2.45243	3.14768	0.251161	0.6176
Il2rb	9.07636	9.77053	0.239775	0.618065
Ly6g5b	2.15845	2.85158	0.264572	0.618511
Zmynd19	2.0509	2.74347	0.196869	0.618752
Timeless	1.63433	2.32632	0.171653	0.619002
Ptpmt1	2.22004	2.91182	0.162321	0.619088
Entpd1	3.7995	4.49043	0.232515	0.619455
Wdr43	3.18422	3.87505	0.223667	0.619496
Gm33104	3.18601	3.87613	0.577257	0.619802
Rps4l	0.611973	1.30205	0.169285	0.619821
Nat10	2.72218	3.41156	0.213824	0.62012
Rexo2	3.45742	4.1465	0.105918	0.620247
Gm44504	2.09661	2.78458	0.149835	0.620727
Uck2	2.25201	2.93818	0.206256	0.6215
Cluh	2.39104	3.07675	0.179078	0.621701
Asf1b	2.20183	2.88656	0.185027	0.622122
Vim	6.63677	7.32136	0.325393	0.622181
Cmtm7	3.7975	4.48208	0.256636	0.622183
Psmg4	3.21389	3.89845	0.318877	0.622192
Tuba1b	6.67444	7.35712	0.33257	0.623006
Tmem106a	1.05878	1.73964	0.288236	0.623792
Lockd	0.849531	1.52901	0.2861	0.624391
Mdfic	4.3369	5.01608	0.264181	0.624522
Nsun2	3.51981	4.19882	0.204799	0.624592
Nolc1	3.14031	3.81903	0.199686	0.62472
Slc16a6	3.22587	3.90425	0.12191	0.624864
Adgrl1	3.28316	3.96149	0.248641	0.624886
Hspbp1	3.71353	4.39052	0.175395	0.625466
Wdr75	2.57664	3.25362	0.236346	0.625473
Mcm5	4.13005	4.80475	0.252189	0.626463
Thop1	0.824283	1.49799	0.0540577	0.626896
Inka1	2.12512	2.79838	0.36603	0.62709
Agfg1	3.75209	4.42495	0.179269	0.627261
Gusb	2.6921	3.3646	0.126799	0.627419
Hirip3	1.26227	1.93359	0.0636009	0.62793
S100a6	7.40025	8.07136	0.246009	0.628027
Bcap29	2.89922	3.56678	0.254195	0.629572
Lmnb1	3.67461	4.34002	0.153794	0.63051
Exosc2	3.0884	3.75328	0.0167058	0.63074
Tmsb4x	11.5076	12.1705	0.0926804	0.631606
Heatr3	1.98195	2.64481	0.0740245	0.631627
Npm3	5.1909	5.8533	0.191483	0.631828
Heatr1	2.40693	3.06888	0.125914	0.632024
Lyl1	2.58035	3.23952	0.30407	0.633243
Kpna2	2.96706	3.62514	0.172666	0.633721
Rnaseh2b	1.78918	2.4451	0.105259	0.63467
Slc26a10	1.92549	2.58103	0.0660592	0.634839
Gm4070	3.94913	4.60444	0.124831	0.63494
Rpp38	0.663277	1.31571	0.0712194	0.636205
Kif22	0.50143	1.1536	0.153203	0.636322
Fkbp2	3.64484	4.29406	0.217145	0.637626
Gemin4	0.812193	1.46096	0.162525	0.637823
Gvin1	3.93396	4.58207	0.128608	0.638114
Fasn	3.71687	4.36321	0.283715	0.638896
Gm17757	0.748333	1.39341	0.0910785	0.639458
Atp5e	7.38526	8.0301	0.160901	0.639563
Slco4a1	1.49045	2.13352	0.309386	0.64035
Msh5	0.45359	1.09659	0.0660918	0.64038
9930111H07Rik	0.969566	1.60922	0.696113	0.641865
Alad	3.24636	3.88582	0.220232	0.641954
Mrpl33	5.06459	5.70389	0.0481425	0.642022
Zbp1	3.87348	4.51226	0.193084	0.642257
Lsm4	5.04548	5.68322	0.0952672	0.642721
Pwwp2b	0.406068	1.04268	0.199203	0.643221
Umps	1.89162	2.52757	0.154942	0.643516
Tmem41a	0.901691	1.53718	0.0688056	0.643724
Nkg7	8.43275	9.06817	0.280247	0.643755
Nutf2	2.90865	3.54358	0.254505	0.643972
Slc39a14	1.79194	2.42559	0.141686	0.644543
Abce1	3.93767	4.5679	0.305306	0.646073
S100a1	2.15589	2.78582	0.407936	0.64621
Fkbp5	4.05453	4.68279	0.28123	0.646955
Mri1	2.18175	2.8086	0.180751	0.647591
Pole2	0.737401	1.36388	0.208343	0.647756
Rrp1b	1.57169	2.19728	0.267457	0.648154
Smim4	1.59274	2.21569	0.0938379	0.649343
Lilr4b	3.71124	4.33411	0.25258	0.649378
Snhg6	2.8099	3.43138	0.144238	0.650003
Igtp	4.64475	5.26557	0.15913	0.650298
Armc6	1.16999	1.79045	0.260836	0.650463
Crtap	2.12678	2.74697	0.241718	0.650586
Phf19	0.706981	1.32716	0.180851	0.650591
Gar1	3.20484	3.82462	0.351909	0.650772
Nedd9	5.24076	5.85998	0.235341	0.651022
Pycrl	2.70883	3.32726	0.305536	0.651379
Polr2l	3.42506	4.0407	0.0990757	0.652641
Romo1	4.26167	4.87471	0.124735	0.653817
Dlgap5	1.03031	1.64249	0.0698316	0.654207
Pcgf6	2.0868	2.69873	0.223821	0.654319
2310039H08Rik	2.17443	2.78503	0.0432033	0.654925
Bola2	5.21745	5.82772	0.208298	0.655073
Egr3	1.69904	2.3093	0.140538	0.655079
Rbm19	2.48761	3.0969	0.20518	0.655519
Tgtp1	3.52224	4.1311	0.158885	0.655714
Tmem176b	6.29632	6.90389	0.268425	0.656302
Snrpd1	4.23995	4.84699	0.172596	0.656544
Nt5dc3	0.943826	1.5495	0.207996	0.657163
Odc1	3.70554	4.31092	0.251901	0.657301
Pycard	2.74059	3.34584	0.0273181	0.657361
Ifi27	4.96443	5.56904	0.197415	0.657646
Slc7a6	1.93087	2.53514	0.237015	0.657802
Nln	1.70463	2.30588	0.21455	0.65918
Anxa2	6.88505	7.48342	0.356707	0.6605
Ptger2	0.553811	1.15196	0.158211	0.6606
Mrgpre	1.72412	2.32193	0.0325969	0.660757
Dhcr24	1.79759	2.39537	0.337609	0.660768
Erlin1	0.798352	1.39596	0.380065	0.660847
Smyd5	1.81033	2.40763	0.277601	0.660989
Faap100	1.39905	1.9951	0.172501	0.661563
Slc29a1	3.01774	3.61106	0.184665	0.662816
Phb	4.2319	4.82511	0.22309	0.662866
Wdr74	3.33958	3.93236	0.235068	0.663062
Mrps16	3.67061	4.26127	0.293955	0.664041
Plscr1	3.6039	4.1941	0.254115	0.664251
Eef1e1	3.21145	3.80137	0.302322	0.664377
Phf11a	1.19492	1.78338	0.00733488	0.66505
Phf11b	3.00725	3.59387	0.190453	0.6659
Tmem256	4.31729	4.90207	0.240441	0.666749
Aimp2	3.16969	3.75402	0.304174	0.66696
Manf	5.75925	6.34316	0.304909	0.667155
Mars2	0.879181	1.46261	0.246163	0.667374
Ran	5.66442	6.24733	0.175967	0.667619
Zfp991	0.595048	1.17686	0.185138	0.668125
Pim1	6.10866	6.68992	0.263372	0.668379
Bcl7c	1.75007	2.33117	0.23596	0.668451
Urb1	1.22663	1.8074	0.219217	0.668607
Cyp51	1.48626	2.06608	0.267516	0.669049
Adat3	0.74504	1.32465	0.328963	0.669145
Mrpl52	5.69147	6.27074	0.0978697	0.669303
Cyba	7.35226	7.92867	0.256526	0.670635
Ada	5.3582	5.93272	0.178263	0.671512
Hnrnpab	6.23672	6.81041	0.282021	0.671897
Tpbgl	1.57855	2.15197	0.363807	0.672018
Eno1b	5.97779	6.54973	0.567107	0.672712
Thyn1	2.83765	3.40924	0.351345	0.672876
Tex264	3.26621	3.83742	0.0957609	0.67305
Camkk2	1.74782	2.31784	0.203299	0.673609
Slc35g1	1.12908	1.69874	0.141609	0.673777
Polr1e	1.1804	1.74822	0.246765	0.674633
Comtd1	0.648912	1.21532	0.0994477	0.675297
Hic1	3.51948	4.08464	0.388673	0.675881
Pkmyt1	2.93202	3.49704	0.365306	0.675945
Ccdc107	3.51099	4.07508	0.0286269	0.676385
Dph5	2.47545	3.03898	0.086535	0.676642
Mat2a	4.25931	4.8225	0.3681	0.676805
Cct3	5.23695	5.79894	0.335583	0.677366
Xaf1	2.23792	2.79984	0.0833257	0.677402
Larp1	3.91439	4.47592	0.221889	0.67758
Slc25a22	2.31276	2.87424	0.245226	0.677603
Nol6	2.85842	3.41966	0.323337	0.677719
Fam19a3	1.67333	2.2345	0.275653	0.677753
Enpp4	2.14869	2.70957	0.233143	0.677889
Xbp1	4.07226	4.63287	0.263443	0.678012
Nob1	3.13899	3.69893	0.297557	0.678331
Hyou1	4.31555	4.8754	0.287086	0.678372
Znhit6	1.39474	1.9533	0.351002	0.678978
Txn1	5.74633	6.30488	0.122431	0.678983
Stard3nl	3.62628	4.18346	0.288856	0.679626
Polr1a	2.25678	2.81386	0.289415	0.679676
Sema4b	2.27699	2.83221	0.240238	0.680555
Wdr12	1.03831	1.59235	0.227724	0.681114
Psme2	7.01732	7.57112	0.289309	0.681226
Sdr39u1	3.46632	4.01934	0.404746	0.681589
Pa2g4	4.44667	4.99905	0.34606	0.681895
Dus2	1.75882	2.3108	0.138855	0.682083
Syce2	1.7371	2.28902	0.247265	0.682107
Nop56	4.54146	5.09331	0.301361	0.682141
Crlf2	4.54569	5.09684	0.277063	0.682476
Ift57	0.920082	1.4707	0.267077	0.682725
Lyrm1	0.615595	1.16612	0.407246	0.68277
Naa25	2.06876	2.61708	0.253807	0.683812
Mrps28	2.3671	2.91529	0.305983	0.683879
Hsp90b1	6.8889	7.43515	0.319072	0.684797
Atp5mpl	4.95491	5.50115	0.147703	0.684799
Mrpl17	0.705134	1.25099	0.094334	0.684985
H2-Bl	1.17287	1.71818	0.121524	0.685244
Pus7l	0.931647	1.47643	0.198067	0.685495
Bdh1	0.652391	1.19558	0.247431	0.68625
Utp20	1.67783	2.22053	0.152375	0.686483
Riox2	2.82937	3.37157	0.345574	0.68672
Rpp14	2.29014	2.831	0.249581	0.687361
Selenbp1	2.43583	2.97626	0.454524	0.687567
Rbm15b	3.41532	3.95444	0.216104	0.688193
Sigmar1	2.11175	2.65083	0.346077	0.688208
Cox5a	5.93691	6.47546	0.3581	0.688461
Tmem97	1.07637	1.61457	0.238814	0.688629
1700052K11Rik	0.616563	1.15452	0.185647	0.688744
Cisd1	2.62273	3.15987	0.312546	0.689135
1810032O08Rik	1.44499	1.98213	0.311908	0.689138
Bop1	3.73967	4.27626	0.335736	0.689399
Bicdl1	1.6038	2.13858	0.22391	0.69026
Pcna	6.65047	7.18284	0.44942	0.691419
Slc39a10	1.96068	2.49209	0.289508	0.691875
Atp23	0.561924	1.09287	0.252142	0.692103
Ldha	6.54907	7.07996	0.312016	0.692128
Tmem176a	6.25903	6.78947	0.353282	0.692344
Scrn2	1.66725	2.19598	0.393151	0.693168
Ubtd1	1.19406	1.72224	0.36035	0.693425
Snrpa	3.8728	4.4009	0.434304	0.693469
1810022K09Rik	3.78623	4.3131	0.177877	0.694058
Tsen54	3.02506	3.55186	0.244377	0.694095
Qtrt2	1.62925	2.15547	0.137495	0.694376
Tubb6	1.83736	2.36326	0.211187	0.694528
Klk8	4.68326	5.20893	0.315889	0.694634
2010111I01Rik	1.01269	1.53802	0.155884	0.694803
Prr7	0.711073	1.23616	0.233919	0.694919
Snhg1	4.26897	4.79372	0.193879	0.695082
Rex1bd	4.46715	4.99174	0.207343	0.695157
Lgals1	6.77442	7.29876	0.417449	0.695278
Anxa6	7.27315	7.79723	0.352309	0.6954
Nudt19	2.62845	3.15197	0.333916	0.695671
N4bp3	2.78404	3.30744	0.306533	0.695732
Fam136a	2.55406	3.0759	0.295829	0.696482
Gdf11	3.18784	3.70952	0.259633	0.696556
Olfm1	1.75066	2.27231	0.23466	0.696577
Degs1	4.19197	4.71343	0.394759	0.696664
Ftsj3	3.58459	4.10536	0.289191	0.696997
Srsf2	6.37896	6.89906	0.253192	0.697325
Mrm1	2.14619	2.66602	0.303776	0.69745
Ube2c	1.23207	1.75149	0.40375	0.697652
Skap1	5.82451	6.34349	0.266815	0.697866
Dock10	5.21723	5.73598	0.329889	0.69798
Ndufaf4	1.33382	1.85256	0.205221	0.697982
Hmbs	2.528	3.04619	0.23566	0.698249
Slc44a2	5.60413	6.12213	0.393353	0.69834
Mrpl23	4.48008	4.99799	0.242451	0.69838
Rap1gds1	4.69664	5.21437	0.317714	0.698468
Gm20172	0.598917	1.11533	0.638258	0.699107
Mpp6	2.36924	2.88548	0.252426	0.699192
Slc39a6	3.46221	3.97721	0.361913	0.699795
Ptpn18	5.28028	5.79525	0.222181	0.699808
Treml2	0.871542	1.38634	0.415571	0.699889
Tex2	2.87897	3.39373	0.138586	0.699913
Sh3bp2	4.17383	4.68854	0.263373	0.699937
Ak2	3.42647	3.94068	0.228368	0.700177
Psmc3ip	0.710092	1.22365	0.253058	0.700492
Dis3	2.22116	2.7343	0.317664	0.700693
Snrnp35	0.675902	1.18894	0.173176	0.700745
Crmp1	0.856629	1.36936	0.190961	0.700894
Gmnn	3.38988	3.90255	0.115098	0.700928
Cdca7l	3.09319	3.60404	0.304097	0.701808
Nenf	1.73242	2.24302	0.366507	0.701931
Fpgs	1.8738	2.38405	0.195102	0.7021
Btf3l4	1.5765	2.08669	0.448904	0.702131
Cox18	2.46775	2.97752	0.353462	0.702332
Irf7	4.66574	5.17523	0.341726	0.70247
Diexf	1.46954	1.97876	0.188656	0.702601
Hspa5	7.21078	7.71988	0.419875	0.702665
Ppat	2.75125	3.26028	0.268858	0.702691
Spata5l1	3.27009	3.77908	0.133402	0.702712
Acsl5	4.71397	5.22251	0.374496	0.702932
Gm18853	0.768873	1.27694	0.149903	0.703163
Noa1	2.19869	2.70674	0.341863	0.703176
Flt3l	4.81911	5.3268	0.250308	0.703348
Arl5a	3.96259	4.4678	0.416334	0.70456
Rbms1	4.38651	4.89152	0.240789	0.704656
Eif3b	5.22043	5.72489	0.330251	0.704927
S100a4	7.67889	8.18309	0.48597	0.705051
Dpagt1	2.3462	2.84872	0.375697	0.705873
Glipr2	4.75987	5.26198	0.457511	0.706071
Gpd2	2.78237	3.28334	0.374364	0.706628
Fbxo5	1.93944	2.43871	0.189148	0.707461
Snrpe	5.96934	6.46815	0.258748	0.707694
H2-Q8	6.1605	6.65813	0.60589	0.708269
Cenpj	1.8566	2.35385	0.29505	0.708459
Vasp	7.09627	7.59215	0.402647	0.709132
Rcc1l	1.91537	2.41001	0.267985	0.709741
Naa38	3.90814	4.40214	0.362263	0.710055
Ehd1	3.34606	3.83959	0.321352	0.710284
Pgk1	5.77312	6.26436	0.342035	0.711415
Fmc1	3.5406	4.03163	0.122312	0.711517
Cchcr1	1.78939	2.2778	0.24384	0.712807
Hint1	6.05456	6.54288	0.346292	0.712858
Sec61g	4.96996	5.45797	0.253389	0.713005
Gm45935	1.01346	1.50138	0.255761	0.71305
Nepro	1.83119	2.31879	0.228877	0.713215
Dut	3.05457	3.5402	0.306702	0.714188
Prdx4	1.42681	1.91216	0.318131	0.714324
Rasa2	3.1077	3.59165	0.222821	0.71502
H2-Q7	5.8742	6.35813	0.333197	0.715031
1810037I17Rik	4.98036	5.46333	0.185247	0.715502
Yaf2	3.53238	4.01457	0.310313	0.715893
Nubp1	3.51263	3.99476	0.197773	0.715919
Usmg5	6.09781	6.57955	0.168202	0.716113
Tmem120b	0.85393	1.33519	0.263193	0.716353
Tedc1	1.74957	2.23051	0.194645	0.716513
Gpr55	1.77526	2.25484	0.269931	0.717186
Lrrc42	2.3804	2.85846	0.226734	0.717943
Nrros	3.39417	3.87209	0.307358	0.718009
Trmt10a	0.829163	1.30444	0.0608913	0.719327
Ccdc115	3.5907	4.06522	0.374777	0.719703
Smad3	4.53187	5.00622	0.415022	0.719788
Itln1	3.87646	4.35048	0.145523	0.719951
Eif2s1	3.79138	4.2649	0.379801	0.720208
Nudt8	1.27826	1.75171	0.49188	0.720238
Xcl1	9.11047	9.5839	0.40634	0.720247
Pet100	2.90619	3.3795	0.390701	0.72031
Sema7a	1.21273	1.68509	0.261539	0.720786
Gm15545	0.589202	1.06104	0.0852253	0.721046
Pnpo	2.92039	3.39189	0.312756	0.721212
Sephs1	2.33312	2.80436	0.387575	0.721348
Hsd17b12	3.70508	4.17615	0.48975	0.721428
Irgm2	3.71565	4.18671	0.253781	0.721439
Dnah8	1.41389	1.88446	0.212795	0.721682
Ebna1bp2	3.72116	4.19144	0.307708	0.721825
Dapk2	4.7218	5.19207	0.362761	0.721829
Casp3	3.34078	3.81072	0.255352	0.721995
Ovca2	2.30421	2.77366	0.301578	0.72224
Polr3h	1.57103	2.04	0.466658	0.72248
Dhx29	2.2678	2.73608	0.319396	0.722826
Smyd2	3.16371	3.63152	0.334348	0.723061
Hectd1	4.60776	5.07509	0.33883	0.723302
Atp5g1	4.85302	5.31903	0.378946	0.723961
Osbpl3	4.62067	5.08559	0.370316	0.72451
Pradc1	1.627	2.09164	0.301034	0.724652
Nme6	0.945381	1.40991	0.253586	0.724709
Rpn1	4.57048	5.03457	0.38689	0.724929
Xkrx	4.00526	4.4689	0.772862	0.725156
Pmf1	3.85984	4.32283	0.222443	0.72548
Erh	5.02757	5.48957	0.407752	0.725978
Eif5a	6.71855	7.18023	0.370908	0.726141
Aarsd1	3.3952	3.85626	0.331204	0.726452
Prelid1	6.5399	7.0009	0.341542	0.726484
G3bp1	5.55294	6.01376	0.364998	0.726576
Lsm2	2.98647	3.44671	0.378246	0.726866
Qtrt1	2.00647	2.46624	0.199019	0.727104
1700025N23Rik	1.84978	2.30928	0.716046	0.727237
Rpl30	3.80111	4.26029	0.0295743	0.727396
Psme3	4.84299	5.30187	0.428417	0.727555
Nt5c	5.2523	5.7104	0.337822	0.727945
4933412E12Rik	1.16991	1.62765	0.284168	0.728124
Tnf	3.95663	4.4131	0.516263	0.728765
Exosc6	3.75491	4.21136	0.322085	0.72878
Enpp5	1.45322	1.90929	0.443124	0.728971
Rnf19b	4.03823	4.49428	0.351628	0.728982
Tmem238	1.51158	1.96635	0.339111	0.729626
Nampt	1.84621	2.30071	0.385193	0.729766
Rpp40	0.610192	1.06383	0.591469	0.730199
Cdc25a	1.81767	2.27099	0.292343	0.730362
Chchd4	1.90302	2.3539	0.496935	0.731598
Cenps	1.84396	2.29444	0.258047	0.731798
Psme1	7.36262	7.81287	0.258302	0.731918
Jazf1	1.24252	1.69275	0.561592	0.73193
Wdr46	3.61593	4.06607	0.252368	0.731972
Mrps2	2.49778	2.94726	0.386515	0.732307
Timm23	5.15794	5.60693	0.365242	0.732554
Plp2	4.60259	5.05001	0.487455	0.733356
Rbm38	5.32476	5.77191	0.421079	0.733492
Ndufaf8	3.85751	4.30368	0.414683	0.733987
Ndufb2	3.53112	3.97584	0.331139	0.734723
Foxred1	2.48986	2.93458	0.335958	0.734729
Hprt	5.53596	5.98052	0.368513	0.73481
Polr3d	2.47339	2.91767	0.342481	0.734948
Dtnbp1	4.32936	4.77342	0.369932	0.735062
Rps27l	4.46787	4.9119	0.289505	0.735074
Tmem273	4.07022	4.51424	0.358089	0.735084
Rn4.5s	1.21772	1.66138	0.481296	0.735267
Cmc4	1.54545	1.98894	0.27726	0.735352
Spata5	2.0261	2.46933	0.297764	0.735485
Lta4h	4.81692	5.26006	0.438792	0.735533
Foxk2	2.82071	3.26345	0.373506	0.735737
Mrpl54	3.3291	3.77182	0.112089	0.735747
Exosc5	4.12275	4.56451	0.296977	0.736236
Csf2ra	0.942633	1.38438	0.412466	0.736241
Ncr1	9.24338	9.6847	0.398228	0.736462
Insl3	1.82027	2.26146	0.1883	0.736528
Pdia6	5.5548	5.9957	0.353431	0.736676
Zbtb18	2.03443	2.47479	0.334415	0.73695
Rwdd4a	2.83417	3.27417	0.295446	0.737137
Cobll1	1.33289	1.77285	0.284696	0.737157
Kmt5a	3.13786	3.57754	0.375603	0.737295
Cops9	5.05512	5.49429	0.198426	0.737556
Pex7	1.9916	2.43022	0.327197	0.737841
Aacs	2.30918	2.74731	0.308442	0.73809
Ddx31	1.74493	2.18297	0.347933	0.738135
Snx10	1.13078	1.56855	0.292728	0.738271
Fhl3	2.61802	3.05558	0.427651	0.73838
Arnt2	1.32942	1.76648	0.371354	0.738642
Slc1a5	4.40344	4.8399	0.466631	0.738946
Slc25a5	6.71578	7.15184	0.460155	0.739149
Rsl24d1	4.2046	4.64063	0.319758	0.739166
Larp4	2.59064	3.02643	0.262068	0.739287
Cox7b	5.09536	5.53021	0.235161	0.739775
Rsl1d1	4.8291	5.26385	0.403781	0.739825
Atp2a2	4.22622	4.66063	0.457363	0.739994
Gsn	2.22883	2.6628	0.30702	0.740217
Gbp3	2.92024	3.35418	0.1977	0.74024
Rpp21	4.25322	4.68693	0.392268	0.740354
Phb2	5.74172	6.1754	0.343205	0.740368
Slc43a3	1.3154	1.74905	0.425591	0.740387
Nlrc5	3.68221	4.11578	0.30233	0.740428
Gm19897	1.97998	2.41353	0.351205	0.740438
Nup93	2.59292	3.02627	0.251266	0.740543
Cntln	1.00674	1.43937	0.26261	0.740913
Myo1g	5.49251	5.92469	0.389583	0.741144
Enkd1	0.775925	1.20702	0.476635	0.741698
Set	6.10016	6.53121	0.320491	0.741725
Prdx1	5.57667	6.00767	0.475393	0.741747
Idi1	2.48246	2.91329	0.468637	0.741836
Sytl3	4.8926	5.32292	0.353951	0.742096
BC029722	3.93542	4.36552	0.468239	0.742211
Tnfrsf18	6.33748	6.76698	0.41752	0.742519
Pidd1	1.3	1.72936	0.193736	0.742594
Nudt3	4.5445	4.97381	0.305135	0.742612
Eif1a	3.24223	3.6712	0.390161	0.742791
Cndp2	4.15225	4.58058	0.457268	0.743117
Atp5g3	6.97275	7.40108	0.228486	0.743124
1110008P14Rik	4.23769	4.66584	0.364265	0.743216
Dbp	1.5934	2.02148	0.385005	0.74325
Fkbp1a	4.46738	4.89532	0.461809	0.74332
Pfn1	10.2082	10.6359	0.336155	0.74341
Sem1	6.66247	7.0897	0.281631	0.743688
Pik3cd	6.3794	6.80656	0.389736	0.743723
Tanc1	1.04272	1.46963	0.24373	0.743854
Man2a1	2.29133	2.71782	0.413695	0.744069
Ccdc102a	4.17025	4.59663	0.335691	0.744125
Eef1akmt4	0.786759	1.21239	0.57886	0.744513
Dhx33	2.59182	3.01743	0.430569	0.744521
Canx	5.56878	5.99392	0.415249	0.744768
Cfl1	9.0849	9.51002	0.199219	0.744779
Bcl3	2.83234	3.25742	0.42569	0.744798
Shmt2	4.08434	4.50877	0.471154	0.745135
Mars	3.14115	3.56499	0.315785	0.745441
Mettl4	1.67235	2.09598	0.276727	0.745546
Nufip1	1.54632	1.96987	0.470057	0.745584
Foxm1	0.758092	1.18154	0.364568	0.745638
Uxs1	2.51176	2.93519	0.134645	0.74565
Wdr83os	4.84054	5.26386	0.293299	0.745705
Fbxw17	1.68032	2.10343	0.373998	0.745818
Tsfm	3.19905	3.62209	0.211446	0.745852
Cuta	5.18921	5.61171	0.211028	0.746131
Myl6	8.83985	9.262	0.388288	0.74631
Eme2	1.94753	2.36958	0.062607	0.74636
Psmg1	2.69715	3.11898	0.307147	0.746479
Pwp1	2.9099	3.33112	0.357147	0.746793
Eyelinc18	2.89527	3.31622	0.757293	0.746934
Mid1	1.82816	2.24902	0.826818	0.746978
Nudt5	3.13211	3.55296	0.230236	0.746987
Cinp	1.51728	1.93783	0.12329	0.747139
Mif	5.66433	6.08482	0.422553	0.747172
Yars2	2.463	2.88329	0.404916	0.747276
Uqcr10	5.36702	5.78722	0.363401	0.747317
Prc1	1.43668	1.85652	0.149283	0.747504
5430416N02Rik	2.71419	3.13379	0.349942	0.747633
Pfdn4	2.67504	3.09442	0.14387	0.747746
Slc25a4	4.75033	5.16939	0.429174	0.74791
Pomp	6.23904	6.65785	0.318743	0.748039
Mrps27	2.2409	2.65949	0.40707	0.748156
Tmem147	3.81742	4.23545	0.513389	0.748448
Stk39	4.09871	4.51582	0.348958	0.748924
Hspd1	4.95347	5.37005	0.43788	0.749195
Ttc27	1.77334	2.18841	0.322808	0.74998
2410018L13Rik	0.802867	1.21653	0.755934	0.750714
Rab27a	3.89033	4.30396	0.322333	0.750731
Rom1	1.57734	1.99074	0.53909	0.75085
Usp36	2.64719	3.0599	0.342465	0.751209
Mettl25	1.05592	1.46863	0.0670432	0.75121
Anp32b	6.2804	6.69251	0.54028	0.751522
Dcun1d3	1.44335	1.8548	0.344241	0.751868
Gbp4	5.7087	6.12014	0.370628	0.751875
Ltbr	0.921388	1.33267	0.529612	0.751957
Sec61b	5.95467	6.36593	0.332383	0.751965
Psma7	5.26332	5.6741	0.386816	0.752217
2410002F23Rik	3.61442	4.02512	0.381602	0.752259
Nkx2-1	1.12695	1.53718	0.701093	0.752504
Tox	4.36174	4.7716	0.406715	0.752697
Alyref	4.89026	5.2994	0.220515	0.75307
Farsb	3.04357	3.45253	0.360218	0.753169
D1Ertd622e	2.08744	2.49627	0.437272	0.75323
Atp8b2	5.03163	5.44042	0.411666	0.753255
Cst7	5.16866	5.57736	0.556859	0.7533
Fam162a	3.82714	4.23428	0.524492	0.754115
Lsm7	4.41972	4.82597	0.233979	0.754586
Dok2	7.24798	7.65323	0.517701	0.755108
Snrpa1	4.10817	4.51254	0.456989	0.755565
Atp5l	6.81839	7.22239	0.321752	0.755761
Ap2s1	5.71513	6.11857	0.370722	0.756054
Tbcb	3.80978	4.21271	0.284282	0.756322
Naf1	1.188	1.59081	0.493425	0.756385
Nus1	3.688	4.09029	0.49252	0.756656
Far1	3.48819	3.89012	0.332935	0.756846
Psmb2	5.16678	5.56863	0.378342	0.756889
Ndufc1	4.15907	4.56068	0.16787	0.757012
Chpf	3.46047	3.86196	0.471315	0.757075
Ruvbl1	3.70056	4.10188	0.336693	0.757164
Me2	3.1452	3.54643	0.437365	0.75721
Pglyrp2	5.69725	6.09832	0.419286	0.757296
Nkrf	0.707819	1.1087	0.327273	0.757397
Rgs18	3.18857	3.58932	0.299837	0.757462
S100a13	5.02772	5.42833	0.278774	0.757539
Krtcap2	5.64673	6.04711	0.424863	0.757654
Napsa	4.25933	4.65922	0.459053	0.757915
Nsl1	1.31126	1.71066	0.431996	0.758173
Casp7	3.78013	4.17894	0.27048	0.758485
9130401M01Rik	2.67111	3.0698	0.467462	0.758549
Scpep1os	1.84897	2.24757	0.716974	0.758594
Il3ra	2.54381	2.94221	0.469503	0.758698
Cox6a1	6.99178	7.38953	0.349899	0.759043
Slc35c2	4.11178	4.50948	0.426234	0.759065
Prmt1	4.91224	5.30966	0.439794	0.759216
Rpl22l1	6.26992	6.66726	0.245473	0.759257
Akt1	5.41007	5.80712	0.490912	0.759411
Kbtbd11	2.53048	2.92747	0.342591	0.759444
Tgoln2	2.70714	3.10332	0.667436	0.75987
Eif2b3	0.953555	1.34972	0.324941	0.759874
Isyna1	4.82582	5.22186	0.453691	0.759939
Gm5547	0.620106	1.01591	0.527297	0.760068
Mrpl36	4.02594	4.42104	0.467868	0.760435
Dusp22	1.935	2.33001	0.352588	0.760481
Pcbp4	3.1516	3.54659	0.455226	0.760494
Eef2kmt	2.37858	2.773	0.208655	0.760795
Tmem68	2.32005	2.71415	0.345845	0.760963
Slc17a9	2.3436	2.73768	0.518221	0.760972
Nup43	2.03379	2.42777	0.538664	0.761029
E2f6	2.38715	2.781	0.409869	0.761095
Cct6a	4.88009	5.2734	0.373385	0.761382
Spcs3	5.02332	5.41567	0.418449	0.761891
Sinhcaf	2.90334	3.29556	0.397327	0.761954
Cklf	2.26743	2.65961	0.316167	0.761975
Sept11	3.57652	3.96737	0.353587	0.762682
Kpnb1	5.00318	5.39372	0.452086	0.762846
Aph1a	4.60619	4.99666	0.507445	0.762882
Bak1	4.44508	4.83533	0.483249	0.763
AI662270	5.40907	5.79876	0.320361	0.763292
Nudt2	2.5459	2.93555	0.567337	0.763314
Mfsd5	3.90037	4.28924	0.502635	0.763724
Pum3	3.15777	3.54646	0.424672	0.76382
Cip2a	0.666237	1.05484	0.271283	0.763871
Litaf	3.27652	3.66496	0.39765	0.763955
Il2ra	3.27289	3.66113	0.0258162	0.764059
Glrx5	4.63377	5.02166	0.327198	0.764244
Sdf2l1	4.66725	5.05509	0.395825	0.764272
Hmgb3	2.00033	2.38804	0.0321589	0.764342
Tbl3	2.70739	3.09501	0.446693	0.764391
Pdia4	4.72415	5.11176	0.421409	0.764394
Mylk4	0.973006	1.36033	0.498556	0.764544
Mdn1	2.18277	2.57005	0.388322	0.764566
Erap1	4.31507	4.70154	0.485298	0.765
Xpnpep1	3.23008	3.6163	0.403149	0.765133
Ppif	3.34207	3.72811	0.475404	0.765223
Cdc14a	2.3987	2.7845	0.334214	0.765355
Irf8	4.48202	4.86702	0.37959	0.76578
Kifc1	0.924348	1.3093	0.434443	0.765805
Jpt2	2.23239	2.61718	0.478294	0.765895
Oaz1	7.03202	7.41631	0.24879	0.76616
Arpc4	5.92521	6.30908	0.383145	0.766376
Tmbim1	2.64911	3.03267	0.589913	0.766544
Iars	2.87732	3.26008	0.231934	0.766967
Banf1	4.63202	5.01441	0.434799	0.767169
Bax	5.52001	5.90221	0.436984	0.767264
Smarcb1	4.07258	4.45473	0.490093	0.767289
Cebpzos	2.20364	2.58559	0.495457	0.767398
Gpr171	3.88721	4.26874	0.481835	0.767625
Dpm3	4.89585	5.27713	0.246272	0.767756
Hddc2	2.89309	3.27382	0.299376	0.768052
Pheta2	1.11652	1.49642	0.537348	0.76849
1110065P20Rik	1.93118	2.31072	0.323319	0.768682
Selenos	4.32498	4.70428	0.367881	0.76881
Prim1	2.80287	3.18181	0.375133	0.769003
Rps19bp1	3.17959	3.55852	0.35355	0.769008
Gstp3	2.4122	2.7911	0.410539	0.769021
Gpd1l	3.06947	3.44834	0.504277	0.769036
Denr	4.001	4.37965	0.414546	0.769157
Cplx2	1.17457	1.5532	0.708349	0.769171
Cbfb	5.40187	5.78017	0.37134	0.769343
Alg3	1.86436	2.24259	0.405982	0.76938
Cstb	4.49318	4.87129	0.452194	0.769441
Ahcyl2	4.15057	4.52825	0.399892	0.769675
Chchd1	4.23372	4.61084	0.285509	0.769973
Ska3	1.19484	1.57104	0.621361	0.770468
Pgls	4.47119	4.84689	0.493815	0.770729
Trub1	1.00129	1.37692	0.389195	0.770765
Ctsz	4.51855	4.89413	0.552156	0.770791
Srp19	4.63885	5.01424	0.364533	0.770897
Racgap1	2.87807	3.25333	0.310623	0.770966
Dnajb5	1.35733	1.73235	0.416321	0.771096
Emc6	3.75301	4.12724	0.529018	0.771514
Msto1	2.51623	2.89004	0.241764	0.771741
Cmas	4.57929	4.95274	0.554658	0.771935
Mcm7	4.10655	4.47941	0.458945	0.772251
Sh3bgrl3	8.35276	8.72558	0.342679	0.77227
Mbd3	4.74507	5.1176	0.484916	0.772423
Vwa5a	3.15046	3.52283	0.367673	0.772511
Xist	5.04513	5.41716	0.22344	0.772689
Cct5	5.63786	6.00988	0.544873	0.772695
Ndufab1	2.70089	3.07284	0.319358	0.772738
Abracl	5.85761	6.22947	0.241359	0.772785
Nol9	3.33643	3.70791	0.424481	0.77299
Nifk	3.72866	4.09989	0.496162	0.773119
H2afj	4.78607	5.1572	0.352106	0.773177
Myo7a	0.873008	1.24409	0.455044	0.773201
Psma5	4.92699	5.29728	0.397737	0.773626
Rpl36al	7.2619	7.63218	0.330732	0.773627
Hnrnpll	3.42951	3.7998	0.230938	0.773631
Rtn4ip1	1.13736	1.50696	0.220572	0.773997
Atp5j2	6.7279	7.0972	0.617417	0.774155
Hemk1	1.88303	2.25227	0.302136	0.774189
Dnmt3b	2.31848	2.68771	0.493238	0.774196
Adgrg5	4.5694	4.93862	0.376718	0.774203
Tomm6	5.68151	6.05004	0.25383	0.774572
Gbp8	4.87819	5.24649	0.349022	0.774695
Fen1	3.32038	3.68827	0.293217	0.774913
Parp12	2.03286	2.40065	0.289565	0.774971
Thumpd1	3.3328	3.70052	0.382441	0.775007
Ccdc166	1.3962	1.76378	0.255378	0.775079
Actg1	9.39978	9.7672	0.48906	0.775164
Fdps	3.22143	3.58857	0.489672	0.775317
Opa3	2.29527	2.66208	0.436799	0.775497
Cct2	5.85856	6.22493	0.441884	0.775733
Ap1s1	4.22562	4.59196	0.33419	0.775748
Usp10	2.30578	2.67196	0.383518	0.775835
Aprt	4.99208	5.35766	0.524333	0.776157
Pop7	3.29509	3.66054	0.578667	0.776226
Prpf19	3.39693	3.76221	0.511396	0.776316
Tmem160	4.88582	5.2511	0.380089	0.776321
Dip2a	0.813874	1.17902	0.29769	0.776391
Eif4g1	5.42291	5.78803	0.47404	0.776406
Nras	4.04985	4.41474	0.382804	0.776528
Nsd2	2.09293	2.45705	0.417541	0.776943
Mlst8	1.53877	1.90284	0.460926	0.776968
Gnaq	0.663284	1.02722	0.280133	0.77704
Syne3	1.73139	2.09516	0.453192	0.77713
Nbn	1.88494	2.24821	0.37714	0.777398
Upp1	1.9761	2.33866	0.541247	0.777783
AI506816	2.22642	2.58875	0.352495	0.777907
Exosc4	3.23175	3.59391	0.267822	0.778
Rangap1	4.59378	4.9559	0.462525	0.778022
Fmnl3	2.88759	3.24968	0.379767	0.778039
Esyt1	6.96052	7.32259	0.505482	0.778047
Metrn	3.78817	4.15018	0.53565	0.778079
Sec11c	6.11948	6.48103	0.284044	0.778332
Psmb10	6.45518	6.81598	0.421884	0.778731
Timm50	3.80695	4.16721	0.47483	0.779022
Bbs12	1.1457	1.50557	0.28514	0.779238
Mrps6	3.1147	3.47416	0.439815	0.779452
Igsf8	2.72374	3.08319	0.591446	0.779458
Gmppb	2.70721	3.06649	0.4715	0.779551
Tomm40	3.90432	4.26346	0.537667	0.779631
Nudc	5.21597	5.57504	0.465258	0.779663
Gars	4.21193	4.57098	0.440833	0.779683
Gjb2	2.19295	2.55184	0.412919	0.779763
Klhl18	3.04655	3.40541	0.507647	0.779778
Etf1	4.20829	4.56712	0.455737	0.779795
Vars	5.68758	6.04641	0.447866	0.779799
Srfbp1	2.68089	3.03958	0.328902	0.779872
Pim3	3.74308	4.10162	0.704683	0.77995
Cox6c	6.65462	7.01281	0.387222	0.780143
Lage3	3.73139	4.08952	0.536867	0.780174
Ndufa11	2.7932	3.15095	0.301533	0.780378
Hmmr	1.33218	1.68943	0.721574	0.780652
Itpripl2	1.87639	2.23359	0.39893	0.780679
Ndufc2	4.84801	5.20509	0.325552	0.780742
Mydgf	4.33536	4.69218	0.470424	0.780886
Syncrip	3.99337	4.34985	0.455883	0.781067
Wars	3.94366	4.3001	0.477328	0.781087
Frmd4b	2.40666	2.76302	0.445425	0.781134
Gfer	1.91451	2.27075	0.356615	0.781194
Pes1	3.84639	4.20225	0.562953	0.781403
Platr17	1.0379	1.39345	0.576192	0.781573
Atp2a3	6.54554	6.90083	0.477035	0.781713
Eif2ak2	2.20426	2.55949	0.106804	0.781742
Uap1l1	3.17354	3.52839	0.492846	0.781951
Igflr1	4.59112	4.94595	0.259178	0.781962
2810004N23Rik	3.19242	3.54699	0.451379	0.7821
Sco2	0.704808	1.0592	0.506665	0.782201
Naip5	1.09399	1.44699	0.6223	0.782956
Cisd3	3.42896	3.78181	0.381911	0.783036
Gm6793	7.95819	8.31068	0.556693	0.783227
Polr2h	2.82467	3.17698	0.485213	0.783331
Slc35b1	3.91987	4.2721	0.36522	0.783375
Plk4	1.41952	1.77174	0.424459	0.783377
Pole4	4.94383	5.29601	0.470172	0.7834
Knstrn	0.688849	1.04099	0.214638	0.783422
Cox17	5.87213	6.22423	0.474519	0.783445
Txn2	4.8116	5.16368	0.421576	0.783457
Mettl22	1.84979	2.20143	0.0117409	0.783696
Tyro3	1.68637	2.03784	0.511795	0.783786
Rbm3	6.0302	6.38118	0.511987	0.784054
BC147527	3.64945	4.00041	0.504289	0.784067
Pkp3	3.25679	3.60759	0.486927	0.784149
Scamp4	3.94995	4.30073	0.631829	0.784161
A230050P20Rik	3.47076	3.82152	0.0468604	0.784171
Timm17a	4.07709	4.4276	0.562886	0.784306
Snrpd3	5.76839	6.11867	0.433668	0.784432
Ckm	0.75702	1.10713	0.0187876	0.784525
Mcm4	4.32563	4.67569	0.478854	0.784551
Zfp566	1.24052	1.58995	0.333999	0.784896
Hint3	3.24189	3.5913	0.253844	0.784903
Cd52	10.0677	10.4171	0.543451	0.784904
Anapc11	3.41175	3.76071	0.462941	0.785151
Smpd5	3.06841	3.41697	0.482913	0.785367
Rpa2	4.29031	4.63833	0.44545	0.785661
Fam49b	4.84919	5.19711	0.475889	0.785713
Nme2	5.47485	5.82253	0.567136	0.785846
Mthfd1l	3.41477	3.76227	0.372489	0.785945
Psmb9	6.17125	6.51875	0.399918	0.785947
Adgre5	8.32455	8.67146	0.504825	0.786266
Mia2	3.84812	4.19494	0.532017	0.786312
Dapk3	3.78799	4.13471	0.370305	0.786372
Adsl	3.19039	3.53687	0.39281	0.7865
Tmem201	1.17971	1.52606	0.446138	0.78657
Cdk4	5.77039	6.11658	0.452368	0.786659
Hsh2d	2.17873	2.52486	0.2633	0.786689
Ndufa13	5.21561	5.56171	0.262295	0.786711
Gnl1	4.47978	4.82569	0.453314	0.786809
Tmem223	4.02544	4.37112	0.501896	0.786936
Aplp1	1.0857	1.43074	0.345727	0.787289
Bzw1	6.03491	6.3799	0.489634	0.787313
Usp17la	1.73756	2.08245	0.807534	0.787369
Ptprv	1.3319	1.67671	0.22664	0.787411
Pbdc1	2.41772	2.76228	0.51418	0.787547
Sfxn1	3.84764	4.19207	0.44822	0.787615
Calm1	6.56522	6.90954	0.437544	0.787678
Fasl	5.45572	5.79965	0.526624	0.787889
Gm12250	4.03346	4.37652	0.41992	0.788365
Tmed5	4.36232	4.70532	0.364496	0.7884
Fam208b	3.11709	3.45978	0.393478	0.788573
Aida	3.44916	3.79175	0.412172	0.788626
Tcerg1	3.6638	4.00637	0.450603	0.788634
Nans	4.64535	4.98744	0.516476	0.788897
Tmem208	4.13237	4.47412	0.291395	0.789079
Ptprcap	8.37091	8.71262	0.41434	0.789107
Ptgs1	2.72856	3.06994	0.571323	0.78929
Coro1c	4.07502	4.4163	0.498234	0.789342
Ssna1	4.92272	5.26377	0.421163	0.78947
Rpia	4.3849	4.72592	0.513595	0.789482
Gm8909	6.01371	6.35462	0.424906	0.789548
Klrb1c	5.87874	6.21935	0.623938	0.78971
Mrps26	5.38114	5.7217	0.434055	0.789734
Fadd	2.21552	2.55585	0.249912	0.789863
Spata24	1.05972	1.39972	0.360805	0.790042
Srsf6	5.2989	5.63882	0.490596	0.790086
Bnip1	2.87142	3.21133	0.406534	0.790091
Gm12669	4.70117	5.04085	0.388397	0.790218
Rftn1	4.66991	5.00945	0.400265	0.790292
Tmem154	3.88944	4.22896	0.488421	0.7903
Calr	7.56611	7.90527	0.57143	0.790503
Pinx1	1.57871	1.91749	0.327066	0.790713
Gps1	4.20279	4.54135	0.423442	0.790832
A930015D03Rik	2.77699	3.1155	0.49483	0.790856
BC035044	2.83279	3.17124	0.568308	0.790892
Marc2	4.76684	5.10492	0.530193	0.791097
Ube2j2	2.705	3.04299	0.120514	0.791142
Wdr5	3.68571	4.02354	0.55149	0.791232
Yrdc	3.54005	3.87658	0.544308	0.791941
Arf5	6.05615	6.39267	0.501145	0.791949
Slfn3	1.41878	1.75524	0.222658	0.791984
Actr1b	4.75343	5.08847	0.522352	0.79276
Eefsec	2.40469	2.73971	0.441098	0.792774
Fes	4.76693	5.10191	0.473437	0.792793
Ripk3	3.9593	4.294	0.486473	0.792952
Rcc2	4.65537	4.99005	0.503201	0.79296
Siva1	3.1507	3.48535	0.391187	0.792978
Socs3	2.81809	3.15268	0.739381	0.793009
Eid2b	0.762063	1.09661	0.271495	0.793033
Llph	4.79467	5.12889	0.356872	0.793215
Arf2	2.71577	3.04988	0.545107	0.793275
St13	5.35395	5.68799	0.478339	0.79331
Stambpl1	2.24885	2.58279	0.220971	0.793366
Sdccag3	4.58515	4.91864	0.496724	0.793612
Mrpl20	3.60187	3.93496	0.552495	0.793832
Wdr36	3.19736	3.52996	0.521078	0.794105
B230307C23Rik	1.68287	2.01363	0.146845	0.795121
Gm7334	2.64007	2.97069	0.658803	0.795194
Dnlz	2.42693	2.75739	0.519787	0.795283
Asb2	5.99701	6.32743	0.518423	0.795303
Lrrc14	2.3823	2.71257	0.591957	0.795391
Grcc10	6.6873	7.01743	0.511631	0.795463
Snrpf	4.53943	4.86955	0.497872	0.79547
Sac3d1	2.50452	2.83445	0.427105	0.795573
Lsm5	4.62394	4.95378	0.366754	0.795624
Bzw2	3.899	4.2288	0.561616	0.795652
Atp5b	7.46734	7.79633	0.530329	0.796095
Mgat2	4.60799	4.93676	0.489145	0.796212
Ybx3	4.83966	5.16827	0.527427	0.796303
Lsm6	2.94827	3.27662	0.436703	0.796443
Serbp1	5.66583	5.99399	0.452511	0.796554
Trim30a	4.16534	4.49336	0.415586	0.796626
Slc12a4	2.21294	2.54096	0.397674	0.796629
Slc36a4	1.04983	1.37767	0.340037	0.796728
Txnrd2	2.3121	2.63952	0.484839	0.796959
Tsen15	2.79417	3.12149	0.392935	0.797016
Rars	4.13733	4.46444	0.568352	0.797128
Nmral1	0.862954	1.18992	0.259961	0.797211
C030006K11Rik	2.52029	2.84723	0.6136	0.797228
Trdmt1	1.04085	1.36774	0.415476	0.797254
Surf2	2.96688	3.2936	0.562579	0.797344
Tagln	0.754882	1.08115	0.196051	0.797597
Sema4a	5.97595	6.3021	0.518972	0.797663
Nudcd1	1.92774	2.25376	0.514672	0.797737
Endog	2.34891	2.67472	0.386185	0.797849
Itgb1bp1	3.5767	3.90236	0.500908	0.797935
Rnf213	3.69453	4.0197	0.434495	0.798208
Hnrnpl	6.6226	6.94768	0.413619	0.798255
Cox7c	6.61637	6.94062	0.265566	0.79871
Pgm1	3.10034	3.42422	0.414601	0.798921
Atp5k	5.84625	6.17006	0.280031	0.798959
Usp31	0.86861	1.19233	0.419517	0.799006
Spryd4	1.88469	2.20824	0.490454	0.799104
Tkt	4.74053	5.06377	0.580341	0.799269
Xrcc6	2.82281	3.14597	0.457767	0.799316
Sec24a	1.66161	1.98473	0.525704	0.799339
Mettl2	2.93458	3.25751	0.0466367	0.799444
Eno3	1.94386	2.26677	0.337386	0.799455
Itgav	4.52073	4.84361	0.389386	0.799476
Fam173b	2.53468	2.85712	0.461483	0.799714
Nol11	2.8046	3.12682	0.433105	0.799838
Alkbh1	3.23681	3.55884	0.468267	0.799943
Ddx18	4.34617	4.66789	0.422319	0.800115
Btbd19	2.64002	2.96162	0.124668	0.800181
Cdv3	4.42195	4.74334	0.568019	0.800302
Dnajc19	2.23959	2.56097	0.566345	0.800303
Tcof1	3.63842	3.95947	0.431339	0.800485
Prelid2	1.44507	1.76611	0.608922	0.800488
Ndufb4	5.05563	5.37631	0.530767	0.800691
Mea1	4.39971	4.72016	0.528589	0.800825
Tmem185b	2.45268	2.77312	0.55704	0.800825
Pspc1	3.46753	3.78767	0.209142	0.800991
Mgat4b	3.4394	3.75948	0.594931	0.801026
Atxn10	4.10015	4.42018	0.521069	0.801054
Ankib1	3.25977	3.57959	0.522205	0.801168
Abhd11	2.40477	2.72457	0.33682	0.801182
Prelid3b	3.649	3.9687	0.447267	0.801237
Btbd10	2.26252	2.58197	0.467925	0.801379
Psmb8	7.4128	7.73221	0.510686	0.801399
Scand1	5.94475	6.26372	0.445816	0.801642
Eif4e	2.88476	3.20346	0.542306	0.801795
Scap	3.6074	3.92587	0.507248	0.801923
Stk40	3.53052	3.84825	0.494556	0.802335
Kars	4.78946	5.10715	0.480806	0.802351
Pold1	3.64619	3.96383	0.49739	0.802386
Actb	10.2167	10.5339	0.354237	0.802588
Gm4791	1.55476	1.87188	0.889114	0.80267
Psma4	5.42905	5.7458	0.483419	0.802876
Bag5	2.79831	3.11498	0.527401	0.802924
Thumpd3	3.40182	3.7184	0.548738	0.802975
Utp4	2.74178	3.0583	0.613033	0.803004
Ptgr1	1.90171	2.21801	0.552387	0.803126
Gspt1	3.64748	3.96341	0.487525	0.803333
Bicd2	2.84525	3.16118	0.49188	0.803335
Tle2	1.31732	1.63319	0.257753	0.803367
Smc2	2.83087	3.14667	0.354084	0.803403
Naa50	3.55795	3.87372	0.405503	0.803421
Hypk	6.26859	6.58416	0.340425	0.803536
Ctu2	2.82147	3.13695	0.462508	0.803583
Homez	0.693935	1.00929	0.372956	0.803654
Tmem219	3.49252	3.80777	0.56523	0.803713
Aga	2.74306	3.05803	0.439588	0.803866
Clptm1l	5.25753	5.57243	0.54173	0.80391
Agpat3	4.7637	5.07854	0.532364	0.803941
Pfas	1.48501	1.79984	0.257028	0.803948
Snrpb	6.75514	7.06959	0.517423	0.804157
Gpr137	1.26739	1.5818	0.450375	0.80418
Golt1b	2.63117	2.94529	0.400817	0.804342
Mb21d1	2.14282	2.45652	0.273549	0.804578
Dbhos	0.856962	1.17065	0.860245	0.804585
Rnf126	3.97387	4.28675	0.536089	0.805032
Trim25	2.95258	3.26538	0.512877	0.805077
Mum1	4.00344	4.3162	0.452701	0.805099
Ssbp4	5.72044	6.03318	0.525327	0.80511
Eif5b	3.36547	3.67809	0.485843	0.80518
Gtf2f2	3.1688	3.48141	0.459759	0.805181
Riok1	3.56712	3.87971	0.377978	0.805192
Noc3l	2.14497	2.45749	0.491446	0.805233
Ddx27	4.06135	4.37369	0.462216	0.805336
Rad23a	4.00781	4.32006	0.490915	0.805387
Tomm5	5.07626	5.38848	0.474297	0.805403
Fbxw4	4.0137	4.32566	0.500386	0.805545
Pdcd2l	2.66487	2.9766	0.363631	0.805675
Ptma	9.17922	9.49072	0.588375	0.805808
Faap20	3.52567	3.83662	0.50289	0.806106
Tesc	3.52748	3.83818	0.319224	0.806249
Farp1	2.2923	2.60277	0.347437	0.806379
Ostc	5.29214	5.60176	0.507382	0.806858
Tsr2	2.02597	2.33551	0.408082	0.806898
Gpr34	3.59104	3.89997	0.491776	0.807239
Smarcc1	2.81059	3.11929	0.392128	0.807367
Gm11346	2.44299	2.75165	0.655658	0.80739
Large1	1.35822	1.66672	0.482121	0.807483
Slc52a3	1.82481	2.13327	0.542662	0.807502
Sorcs2	0.720415	1.02885	0.57177	0.807519
Optn	1.83719	2.1456	0.379654	0.807532
Eif1ax	2.76658	3.07497	0.603815	0.807539
Hacd3	3.58406	3.8923	0.460504	0.807625
Rrp7a	3.98675	4.29476	0.538832	0.807751
Vma21	2.16949	2.47735	0.532372	0.807836
Dnajb11	4.66454	4.97175	0.544973	0.808202
Cltb	3.55123	3.85843	0.614814	0.808206
Ddx54	4.19557	4.50248	0.577022	0.808373
Gbp9	4.99038	5.29727	0.360691	0.808379
Bola3	2.4238	2.73068	0.453934	0.808391
Ttc7b	3.95254	4.25932	0.481018	0.808446
Nrm	2.60838	2.9148	0.506142	0.808642
Rbbp7	5.42236	5.72877	0.565078	0.808656
Txndc5	3.5633	3.86961	0.557743	0.808708
Zfp507	2.1287	2.43467	0.523752	0.808898
Mrpl41	2.56946	2.8754	0.477143	0.808918
Sf3b5	5.67211	5.97768	0.494003	0.809121
Jmjd7	2.35455	2.65998	0.449246	0.809201
Lrrc8c	4.59145	4.89647	0.498129	0.809434
Zfp821	0.74633	1.05103	0.506528	0.809609
Snai3	2.8007	3.10521	0.43693	0.809717
Utp15	2.60154	2.90584	0.4741	0.809832
Tnfsf10	5.83014	6.13428	0.391515	0.809922
Gm10052	6.48879	6.7928	0.609551	0.810001
Ppcdc	3.04609	3.35002	0.27032	0.810041
Crybg2	2.68448	2.98785	0.455089	0.810353
Zdhhc12	1.93336	2.23655	0.394002	0.810461
Psmb3	6.35121	6.65403	0.51882	0.810671
Sdhb	5.43693	5.73959	0.467449	0.810758
Metrnl	2.93622	3.23886	0.639354	0.810767
Gm7367	4.97763	5.28023	0.581942	0.810786
Ptpn7	6.29095	6.59346	0.439205	0.810838
Trappc6a	3.85306	4.15534	0.515948	0.810969
Mrps12	3.09396	3.39618	0.467625	0.811004
AW011738	3.00119	3.30325	0.512326	0.811095
Ccdc12	5.75652	6.05817	0.484886	0.811321
Dpcd	2.88009	3.1817	0.636827	0.811344
Mrpl57	2.68083	2.9824	0.315985	0.811366
Mrrf	1.41256	1.71408	0.461456	0.811395
Tap1	5.49321	5.79396	0.44218	0.811832
Pgd	4.84416	5.1449	0.533717	0.811833
Mrps21	5.54146	5.84216	0.350756	0.811858
Ywhah	6.086	6.38663	0.623309	0.811901
Rbm43	3.36553	3.66601	0.529169	0.811984
Kcnab2	5.47982	5.78018	0.654213	0.812049
Xpot	2.52536	2.82568	0.512881	0.81207
1700037C18Rik	0.718979	1.01926	0.465883	0.812093
Sae1	4.26861	4.56874	0.567836	0.812177
Mapk6	2.95641	3.25649	0.553681	0.812208
Coa3	4.71787	5.01749	0.552304	0.812463
Psmb5	5.61421	5.91382	0.474885	0.812474
Ndufs3	5.10012	5.39959	0.419186	0.812554
Gtf3a	4.0091	4.30814	0.588529	0.812795
9130023H24Rik	0.896584	1.1956	0.44219	0.812806
H60b	2.07508	2.37404	0.163719	0.812836
Nt5m	2.1691	2.46766	0.556553	0.813063
Dgkd	5.56425	5.86276	0.572049	0.813089
Ehd4	3.2815	3.57954	0.584791	0.813355
Pabpc4	4.23349	4.53118	0.551813	0.813552
Parvg	5.49109	5.78859	0.597755	0.813657
Hccs	3.04822	3.34568	0.535864	0.813687
Rhoa	6.776	7.07344	0.53149	0.813696
Vps29	3.48753	3.78481	0.547424	0.813782
Stau2	0.820549	1.11768	0.557095	0.813867
Tuba1c	4.27939	4.57648	0.603752	0.813892
Cfap298	2.53755	2.83448	0.537243	0.813985
Ctnna1	4.25165	4.54846	0.60022	0.81405
Csrp1	4.4267	4.72319	0.588455	0.814234
Dars	4.1066	4.4029	0.513838	0.814338
Adar	3.67966	3.97552	0.480065	0.814583
Dph2	2.14569	2.44146	0.565435	0.814638
Atp5o	5.9603	6.25592	0.572348	0.814722
Fah	1.23815	1.53374	0.448526	0.814741
Ppp5c	4.44872	4.74425	0.570632	0.814774
Tmem65	1.6269	1.92232	0.535273	0.814834
Golga7	5.23962	5.53496	0.551928	0.814875
Pacsin2	4.43251	4.72766	0.597128	0.814989
Rpl34	5.69518	5.99028	0.732895	0.815014
Herc6	2.58722	2.88197	0.344643	0.815219
Trappc4	4.54584	4.84013	0.575633	0.815472
Nif3l1	1.69136	1.98508	0.329474	0.815791
Ppib	6.69459	6.98818	0.588291	0.81587
Smdt1	6.08706	6.38031	0.491373	0.816058
AA388235	1.4597	1.75273	0.705078	0.816183
Id3	2.93392	3.22688	0.474736	0.816226
Mpv17l2	3.89144	4.18429	0.557975	0.81629
2210016F16Rik	3.33783	3.63068	0.379037	0.816291
Aifm2	1.33767	1.62996	0.446374	0.816603
Rnaset2b	4.64253	4.9348	0.467822	0.816618
Abi3	3.4428	3.73505	0.515291	0.816631
Pdia3	7.13484	7.42705	0.546566	0.816646
Rtl8a	2.95054	3.24272	0.339043	0.816663
St3gal4	4.07176	4.36383	0.593702	0.816729
Rplp2-ps1	2.05573	2.34776	0.0208585	0.816752
Ntmt1	1.02656	1.31848	0.548807	0.816815
Praf2	2.67048	2.96236	0.558149	0.81684
Ruvbl2	4.17682	4.46869	0.493678	0.816843
Morc2a	2.80978	3.1015	0.590467	0.816932
Sec61a1	5.21802	5.5096	0.534743	0.817005
Acads	3.86633	4.15782	0.563703	0.817061
Fkbp8	6.27994	6.57097	0.573496	0.81732
Mrpl34	4.18204	4.47274	0.481082	0.817504
Gm20753	1.1594	1.45004	0.851427	0.817539
Npepl1	4.7139	5.00452	0.478348	0.81755
Mtrr	1.71011	2.00059	0.389679	0.817629
Cep41	0.972584	1.26302	0.536792	0.817656
Lactb2	2.09689	2.38635	0.388075	0.818207
Dbnl	6.11765	6.40683	0.524221	0.818368
Cd247	3.08866	3.37749	0.596899	0.818563
Tmem42	2.59687	2.88556	0.566002	0.818648
Dohh	3.92894	4.21761	0.583867	0.818656
Erdr1	5.21245	5.50091	0.532012	0.818779
Afdn	1.22275	1.51056	0.494776	0.819148
Lrpprc	3.13191	3.41963	0.406945	0.819192
Twnk	1.71423	2.00196	0.651522	0.819192
Cd244a	5.4736	5.76105	0.466181	0.819348
Ncf2	2.45014	2.73758	0.443297	0.819358
Tomm20	3.23789	3.5244	0.513949	0.819884
Ppil1	3.17219	3.45855	0.580869	0.819971
Gnl2	3.69384	3.97987	0.513148	0.820155
Fh1	4.5693	4.85527	0.577283	0.82019
Ccdc124	5.49882	5.78477	0.531814	0.820203
Hnrnpa0	6.47641	6.76225	0.499126	0.820266
Hspa4	4.54274	4.82831	0.538381	0.820418
Cenpb	4.6946	4.97991	0.645201	0.820565
Zdhhc13	2.48793	2.77321	0.590806	0.820584
Dynlt1f	0.903847	1.18887	0.38805	0.820727
Crim1	3.99275	4.2777	0.601728	0.820769
Mecr	2.20313	2.48806	0.256677	0.820784
Cdk2	3.39176	3.67662	0.458106	0.82082
Sub1	5.20081	5.48544	0.399929	0.820956
Tusc1	2.81161	3.09604	0.550954	0.821067
Tgfb1	5.62232	5.90673	0.551304	0.821074
Hras	3.06649	3.35063	0.438409	0.821235
Cct7	5.62304	5.90711	0.582894	0.821271
Psmd3	4.86451	5.14827	0.538358	0.821447
Insig1	2.8565	3.1402	0.634623	0.82148
Ntan1	4.63346	4.91691	0.464655	0.821624
Prr5	2.53171	2.81508	0.583537	0.821672
Pola1	1.48815	1.77148	0.57223	0.82169
Ndufb7	6.19004	6.47337	0.564768	0.821693
Zfp512b	2.56772	2.85078	0.495251	0.821844
Cdkn2c	2.09565	2.37866	0.469632	0.821878
Ddx60	1.94056	2.22354	0.428802	0.821894
Amd2	2.79382	3.07677	0.513186	0.82191
Uqcrq	4.25123	4.53413	0.474368	0.821937
Mvb12a	4.70385	4.98641	0.511112	0.822128
Fam78b	0.802758	1.08506	0.426571	0.822279
D16Ertd472e	4.48203	4.76401	0.554814	0.822461
Slc16a3	1.56399	1.84591	0.560781	0.822498
Tpi1	5.33371	5.61561	0.580669	0.822505
Atrip	1.60523	1.88693	0.535183	0.822618
Arpc1b	7.76489	8.04659	0.490331	0.822625
Map3k8	2.90568	3.18706	0.515524	0.822807
Minpp1	3.17004	3.45135	0.482783	0.822846
Scly	4.19858	4.47953	0.610996	0.823049
Ndufa3	5.84739	6.1281	0.673271	0.823185
Abhd17a	5.24513	5.52571	0.566421	0.823261
Lamtor4	4.98437	5.26487	0.532941	0.823305
Dtymk	3.83757	4.11794	0.574182	0.823381
Mbnl3	2.05808	2.33832	0.454204	0.823457
Txndc11	3.41394	3.69395	0.561502	0.823584
Gm12216	0.847149	1.12713	0.550377	0.823604
Atn1	4.25872	4.53817	0.62848	0.823905
Lcp1	7.96356	8.243	0.562856	0.823908
Selenoh	4.79383	5.07322	0.596257	0.823935
Ccdc134	2.57136	2.85063	0.60686	0.824006
Ttc39b	4.06351	4.34272	0.518401	0.824042
Samd1	3.36832	3.64744	0.517781	0.824094
Pola2	3.33531	3.61443	0.431221	0.824095
Stoml2	3.96967	4.24848	0.498912	0.824269
Polr3g	1.61833	1.89695	0.653659	0.824379
Rffl	1.68151	1.96012	0.580255	0.824383
Cox4i1	7.33082	7.60937	0.551465	0.824418
Pdp1	1.75772	2.03557	0.562722	0.824821
Commd1	3.61586	3.89351	0.577424	0.824932
Hcst	6.99589	7.27319	0.451451	0.825135
Shb	1.44577	1.72299	0.464959	0.825182
Eif4e3	4.06675	4.34379	0.526186	0.825288
Mak16	3.96164	4.23834	0.581797	0.825479
I730030J21Rik	2.76165	3.03831	0.493277	0.8255
Gapdh	8.19765	8.47428	0.554121	0.825515
Fam206a	1.71665	1.99325	0.625736	0.825535
Lpgat1	2.42136	2.6979	0.503352	0.825568
Ralgds	2.59281	2.86919	0.521314	0.825657
Tnfaip8	3.87621	4.15243	0.55686	0.825753
Gsr	2.84591	3.12179	0.648749	0.825944
Mrpl35	1.89552	2.17099	0.18346	0.826187
Ampd2	2.6728	2.94797	0.585596	0.826348
Klf16	2.87687	3.15181	0.658784	0.826486
Gm20324	1.28327	1.55745	0.633119	0.826925
Arpc5	6.91139	7.18508	0.55063	0.8272
Gpn1	2.63667	2.90965	0.489093	0.827608
Rfc5	3.1551	3.42795	0.637873	0.827683
Taf5l	3.5635	3.83616	0.623511	0.827793
9330133O14Rik	1.16119	1.43323	0.531715	0.828146
Lrrc59	4.35843	4.63047	0.570932	0.82815
Tmed2	6.34157	6.61315	0.531285	0.828412
Ube2e1	4.54316	4.81469	0.64635	0.828438
Rpl37a	9.059	9.33047	0.495412	0.828474
Pgp	4.22012	4.49122	0.517547	0.828685
Upf3a	3.73053	4.00152	0.553807	0.828746
Ssr2	5.09599	5.36691	0.618461	0.82879
Gm20337	2.43508	2.70589	0.85993	0.828852
9030025P20Rik	2.27439	2.54516	0.603156	0.82888
Hnrnpd	4.48998	4.76074	0.51503	0.828886
Tbca	6.14597	6.41672	0.388352	0.828887
Gng10	6.14848	6.41895	0.591516	0.829048
St7	1.10419	1.37454	0.457522	0.829118
Emilin2	2.42663	2.69651	0.591064	0.829389
Nelfe	3.37455	3.64443	0.54029	0.82939
Pacsin1	2.42675	2.69659	0.435564	0.82941
Fam219a	1.27433	1.54413	0.304293	0.829432
Rmnd5b	4.26605	4.53575	0.553071	0.829495
Vcl	1.84262	2.11222	0.471096	0.829549
Pnkd	1.65899	1.92838	0.618552	0.829667
Naa15	3.52977	3.79903	0.409587	0.829742
Pml	2.86784	3.13698	0.478173	0.829814
Uap1	2.27649	2.5455	0.530358	0.829888
Ndufa8	5.12521	5.39388	0.544954	0.830081
Cdk2ap1	5.36134	5.62988	0.587249	0.830161
Bc1	4.12843	4.39647	0.778768	0.830446
H2-T24	3.30545	3.57346	0.402933	0.830468
Coro1a	8.9783	9.24587	0.571345	0.830715
Memo1	3.27318	3.54024	0.524383	0.831012
H2afx	4.10648	4.37344	0.627317	0.831068
Gm8580	4.07494	4.34172	0.586421	0.831173
Tmem191c	2.09118	2.35774	0.508217	0.831298
Ocel1	3.35575	3.62219	0.496761	0.831371
Fntb	2.0466	2.31297	0.493512	0.831407
Raly	6.67369	6.93992	0.5884	0.831486
Cib1	4.43995	4.70612	0.668955	0.831523
Tram1	5.43765	5.70379	0.519483	0.831543
Zfp358	2.09379	2.35988	0.3939	0.83157
Sf3b3	4.75352	5.01959	0.599119	0.83158
Psmc5	4.94526	5.21128	0.488423	0.831612
Lars	3.72313	3.98901	0.528482	0.831692
Susd3	3.86138	4.12676	0.544738	0.831979
Klhdc4	3.55558	3.82058	0.527806	0.832196
Tars	4.06655	4.33115	0.532232	0.832431
Slirp	3.65464	3.91912	0.554679	0.832499
Naa10	4.53381	4.79816	0.533554	0.832574
Plcb2	3.74302	4.00733	0.511486	0.832597
Grasp	2.4903	2.75443	0.622891	0.832703
Map1s	3.14679	3.41058	0.483243	0.8329
Rnps1	4.85862	5.12241	0.664829	0.832902
Ddx39	3.73359	3.99736	0.438614	0.832905
Ppa2	2.87387	3.13755	0.62216	0.832963
Tmem69	3.32054	3.58397	0.67979	0.833103
Dcun1d2	2.26117	2.5246	0.516585	0.833108
P4hb	5.6765	5.93967	0.596525	0.833256
Myl12a	6.37633	6.63941	0.593448	0.833303
Mrpl55	2.70885	2.97177	0.615123	0.833399
Edf1	6.50446	6.76724	0.568852	0.83348
Ppm1m	4.63981	4.90217	0.59347	0.833722
Coq2	3.70738	3.9693	0.397984	0.833975
Mvb12b	3.63443	3.89629	0.596681	0.834015
Cdc34	4.65036	4.91177	0.596585	0.834273
Dll1	2.8367	3.09809	0.385712	0.834288
Timm13	4.4393	4.70061	0.559713	0.83433
Uqcr11	5.33274	5.59394	0.516832	0.834398
Rgs19	4.25178	4.51297	0.598873	0.834402
Zbtb17	2.85908	3.1202	0.446152	0.834436
Arhgdia	7.13962	7.40072	0.631333	0.83445
Faim	3.90945	4.1705	0.618029	0.83448
Trnau1ap	3.50477	3.76566	0.499351	0.834574
Carmil2	4.56374	4.82461	0.602204	0.83458
Adpgk	2.98482	3.24548	0.585689	0.834705
Fkbp4	4.9889	5.24926	0.714048	0.834882
Rps6ka1	6.05049	6.31081	0.555771	0.834906
Hmgcr	2.9068	3.16684	0.617273	0.835068
Pcbd2	4.32435	4.58416	0.619278	0.835197
Rcsd1	5.71581	5.97561	0.648799	0.835204
Marcksl1	1.30621	1.56597	0.378275	0.83523
Ado	2.71016	2.96987	0.467453	0.835253
Ly6c1	2.5778	2.83742	0.726022	0.835308
Actr2	6.916	7.17557	0.602738	0.835332
Lrrc75a	2.06527	2.32464	0.600857	0.835453
Galns	3.4842	3.74357	0.589738	0.835456
Surf4	5.72862	5.98792	0.672397	0.835488
Camk1	1.57842	1.83738	0.622763	0.835691
Ndufs8	4.82399	5.08295	0.575924	0.835692
Anxa4	1.75636	2.01524	0.55903	0.835739
Mogs	4.88664	5.1455	0.599604	0.835747
Pex12	1.26888	1.52758	0.610184	0.83584
Sla2	4.96619	5.22485	0.570859	0.83586
Ubash3a	4.09093	4.34951	0.558918	0.835911
Ankrd39	2.42734	2.68557	0.594582	0.836111
Mrps24	4.65265	4.91074	0.572461	0.836197
Cops3	4.07683	4.33467	0.547337	0.836342
Mmp9	3.78606	4.04375	0.714595	0.836427
Parp14	4.32922	4.58691	0.514357	0.836428
Rad54l2	3.75493	4.01192	0.597733	0.836831
Xdh	3.84016	4.09707	0.493868	0.836881
Cops4	4.01992	4.27681	0.551476	0.83689
Snrpd2	6.18032	6.43716	0.67829	0.836918
Ogfod3	1.71203	1.96853	0.463283	0.837114
Pltp	2.07585	2.33222	0.583834	0.837187
Wscd2	1.57702	1.83326	0.558437	0.837273
Eif3a	5.50109	5.7573	0.597542	0.837283
Capzb	7.27542	7.53154	0.550316	0.837332
Rdh13	0.975274	1.23136	0.636929	0.837358
Rabepk	2.32064	2.57651	0.496711	0.837484
Gsto1	2.12943	2.38498	0.699804	0.837668
Epb41l4aos	3.12423	3.37961	0.658607	0.837766
Srsf9	4.90851	5.16358	0.472096	0.837943
Anapc15	2.56029	2.81527	0.523828	0.837995
Rab31	1.2347	1.48961	0.545273	0.838036
Rnaseh2c	5.85893	6.11384	0.626752	0.838037
Nol12	3.56989	3.82474	0.0304738	0.838073
Ndufb6	4.48836	4.74321	0.565542	0.838075
Gale	2.18578	2.44062	0.491974	0.838078
Ergic1	3.16637	3.42113	0.567793	0.838127
Ptpa	5.07043	5.32518	0.664796	0.838136
Eif2s2	4.40741	4.66214	0.494339	0.838148
Nr2c2ap	3.32296	3.57755	0.744827	0.838224
Dock5	2.86774	3.12201	0.575637	0.838406
Uhrf1bp1l	2.78311	3.03736	0.593286	0.838423
Chn2	4.42657	4.68081	0.590133	0.838429
Lmnb2	2.76239	3.01644	0.572675	0.838536
G530011O06Rik	1.30154	1.55542	0.774813	0.838638
4930544D05Rik	1.30527	1.55914	0.433787	0.838646
Arhgap11a	0.865735	1.11957	0.556963	0.838664
Por	5.00603	5.25975	0.610685	0.838734
Ttc37	2.30065	2.5542	0.452852	0.838831
Cox16	2.22294	2.47631	0.546999	0.838937
Rai1	2.93026	3.18348	0.50598	0.839022
Cmc1	3.10626	3.35939	0.430627	0.839073
Rpa3	4.38911	4.64208	0.371875	0.839171
Mitd1	3.61865	3.87161	0.4628	0.839173
Lactb	3.25017	3.50297	0.4625	0.839261
Ebp	3.81227	4.06485	0.655444	0.839395
Ppdpf	5.06527	5.31778	0.65749	0.839435
Pctp	1.95536	2.20766	0.627719	0.839558
Tmem159	2.20663	2.45879	0.735055	0.83964
U2af1	5.17561	5.42764	0.632135	0.839714
Plekhj1	5.06017	5.31219	0.533903	0.839722
Cyth3	3.28045	3.53228	0.42332	0.839831
Plscr4	1.66882	1.92045	0.661587	0.839944
Cebpz	3.47638	3.72792	0.533843	0.839997
Tap2	6.40096	6.65222	0.549378	0.840161
D17Ertd648e	2.5573	2.80835	0.666561	0.840282
Cep83	2.46619	2.71716	0.56155	0.840331
Ap1ar	3.15105	3.40194	0.456771	0.840379
Mier2	2.66866	2.91923	0.585937	0.840559
Agpat5	1.00831	1.25873	0.582238	0.840652
Eif5a2	0.969779	1.22014	0.621199	0.840685
Noc4l	3.11349	3.36382	0.665037	0.8407
Nup62	3.41589	3.6658	0.680436	0.840945
Rps6ka4	3.73272	3.98252	0.560615	0.841015
Pitrm1	2.91836	3.16815	0.659375	0.841022
Slfn5	2.81641	3.06618	0.292736	0.841033
Jpt1	6.33924	6.5884	0.695011	0.841388
Rcn1	5.46714	5.71622	0.666807	0.84143
Adgrg3	2.57174	2.82078	0.544095	0.841456
Gstcd	1.61168	1.86022	0.612224	0.84175
Zcchc24	2.10309	2.35137	0.612525	0.841902
Paics	4.52085	4.76886	0.637055	0.842057
Cep85l	1.22825	1.47622	0.323352	0.842079
Coa4	2.34371	2.59162	0.717161	0.842113
Med9	1.95879	2.20655	0.622044	0.842203
Pin1	3.91233	4.15995	0.549343	0.842282
Wdr77	3.04746	3.29503	0.649914	0.842314
Mto1	2.45211	2.69947	0.624036	0.842437
Efr3a	4.99829	5.24563	0.595925	0.842446
Fnbp1	5.89104	6.13838	0.550512	0.842448
Srsf10	3.67113	3.91845	0.577295	0.842459
Spcs1	5.35526	5.60253	0.629741	0.842492
Pak1ip1	4.01615	4.26298	0.472286	0.842744
Casp8	4.90247	5.14926	0.563311	0.84277
Hexa	4.36686	4.61352	0.690771	0.842846
Rfc4	2.69407	2.94072	0.590588	0.842847
Bccip	4.83184	5.07839	0.654786	0.842911
Ptp4a1	1.30448	1.55051	0.793377	0.843213
1700010I02Rik	3.81551	4.06148	0.875027	0.843248
Gipc1	3.85311	4.09853	0.599419	0.843571
Taf10	6.16453	6.40994	0.631667	0.843572
Speer8-ps1	0.827719	1.07297	0.902185	0.843667
Cd47	5.76031	6.00551	0.538608	0.843701
H2-Q1	2.43996	2.68487	0.233814	0.843871
Cct8	5.49474	5.73947	0.601496	0.84397
Azin1	3.87082	4.11548	0.625444	0.844013
Sergef	2.56412	2.80867	0.514787	0.84408
Tti2	2.01141	2.25595	0.119659	0.844082
Cenpt	1.95535	2.19971	0.558371	0.84419
Tnk2	5.64021	5.88455	0.645121	0.844204
Cdc37	6.05617	6.30032	0.542295	0.844317
Ndufa4	6.66521	6.9093	0.577863	0.84435
Etfb	5.09755	5.34116	0.613584	0.844627
Nudt6	1.75923	2.00278	0.480544	0.844664
5730408K05Rik	1.78165	2.02518	0.613677	0.844679
Trmt1	3.11257	3.35609	0.603121	0.844681
Tor2a	3.98883	4.23221	0.533109	0.844766
Chsy1	6.74628	6.98958	0.621084	0.844813
Med8	3.13766	3.38089	0.688349	0.844854
Kctd9	2.7072	2.95033	0.597637	0.844912
Tdrd7	2.6473	2.89042	0.568941	0.844915
Fubp1	3.64351	3.8865	0.556722	0.844993
Pkm	7.15169	7.39466	0.643543	0.845003
Nmd3	3.88656	4.12944	0.611666	0.845056
Tatdn1	1.30812	1.55082	0.233875	0.845165
Dot1l	2.59021	2.83288	0.546981	0.845176
Tubb4b	5.72151	5.96389	0.728348	0.845349
Parp3	2.94599	3.18831	0.649221	0.845385
Mrpl19	2.16251	2.40445	0.360779	0.845608
Lat2	5.42206	5.6639	0.573334	0.845668
Them6	2.75427	2.99585	0.720826	0.845817
Sema4d	5.39402	5.6355	0.505367	0.84588
Idh3a	4.12809	4.3695	0.67625	0.845916
Minos1	4.29245	4.53369	0.51947	0.846016
Atp6v0a2	4.75064	4.99182	0.629357	0.846051
Nudcd2	2.9189	3.15924	0.501049	0.846543
Mad2l1	2.53917	2.7795	0.659593	0.84655
Eloc	4.02505	4.26529	0.650539	0.846608
Tpm3	7.00001	7.24023	0.571255	0.846615
Nup54	3.32017	3.56036	0.550208	0.84663
Colgalt1	4.22081	4.4609	0.632425	0.846691
Unc13d	4.91625	5.15611	0.619941	0.846825
Smco4	1.48005	1.71988	0.705713	0.846842
Slc9a3r1	6.6759	6.91571	0.639759	0.846853
Aldh18a1	3.19869	3.43843	0.632117	0.846894
Taf1a	2.59632	2.83588	0.261942	0.847002
Acsl4	3.11842	3.35798	0.353029	0.847004
Spsb2	2.38017	2.61968	0.506606	0.847035
Mtch2	3.65518	3.89467	0.655512	0.84704
Tomm22	5.4886	5.72805	0.558345	0.847066
Naprt	1.91281	2.15225	0.699622	0.847074
Tagln2	7.05433	7.29362	0.676852	0.847163
Med29	2.23693	2.47593	0.550114	0.847328
Nedd8	6.30775	6.54673	0.676166	0.847344
Polr2k	4.25589	4.49468	0.449618	0.847458
Cc2d1b	3.98273	4.22151	0.549662	0.84746
Thap12	3.40744	3.64613	0.668866	0.847513
Suco	3.81315	4.05181	0.640075	0.847532
Hyi	2.66242	2.90095	0.55523	0.847608
Gnb1	6.28476	6.52312	0.588132	0.847707
Hspe1	5.40617	5.64452	0.642834	0.847717
Osgin1	3.7518	3.99011	0.769652	0.847734
Trmt5	1.93273	2.17105	0.354648	0.847737
Ola1	3.68075	3.91898	0.648741	0.847785
Pitpnm2	3.74523	3.98318	0.609169	0.847945
Tmem203	3.16229	3.40019	0.518384	0.84798
St6galnac4	2.85574	3.09353	0.64949	0.848041
Sdhd	4.98337	5.22107	0.652726	0.848097
Vdac3	5.0018	5.23934	0.705645	0.848194
Afg3l1	3.10712	3.34457	0.5862	0.848243
Elk1	1.64168	1.87905	0.554551	0.848289
Calm3	6.03811	6.27544	0.60934	0.848318
Mfhas1	1.60903	1.84634	0.599406	0.848323
Cdc16	3.34783	3.58512	0.515662	0.848334
Rbm45	3.76867	4.00589	0.620242	0.848381
Pgghg	2.11153	2.34871	0.576448	0.848404
A330069E16Rik	1.53502	1.77214	0.464468	0.848435
Arv1	1.36426	1.60058	0.143913	0.848907
Pip4k2b	4.53939	4.77571	0.639873	0.848909
C1d	2.83839	3.0746	0.486644	0.848974
D5Ertd615e	3.37676	3.61289	0.861442	0.84902
Josd1	2.72498	2.96107	0.69095	0.849043
Snrnp27	4.35599	4.59191	0.61333	0.849145
Nomo1	3.52989	3.76558	0.657157	0.849284
Wdr18	2.67689	2.91245	0.689614	0.849359
Tma7	7.28437	7.51985	0.282061	0.849402
Rrp8	2.50422	2.7396	0.660215	0.849464
Ywhae	6.1285	6.36374	0.621364	0.849546
Lpp	1.23055	1.46556	0.310078	0.849675
Cox5b	6.61967	6.85459	0.692629	0.849733
Sox1ot	0.85517	1.09007	0.877607	0.849746
Lcmt2	1.22247	1.45716	0.243878	0.849865
Elob	6.56287	6.79752	0.520422	0.849893
1700025G04Rik	1.73156	1.96598	0.639838	0.850029
Gm5643	3.2315	3.46584	0.786833	0.850074
Slc35f6	1.24031	1.47459	0.439047	0.850112
Rrm1	3.56894	3.80261	0.606152	0.850465
Hdgf	4.85874	5.09225	0.626614	0.850563
Wdr90	1.04786	1.2813	0.350125	0.850608
Selplg	7.43143	7.66483	0.696134	0.850629
Gdpd5	3.40943	3.64281	0.529272	0.850643
Parp10	4.57833	4.8117	0.596478	0.850649
Rae1	4.39831	4.63163	0.647722	0.850676
5830432E09Rik	2.38436	2.61763	0.471315	0.850703
Smg5	3.83863	4.0719	0.620476	0.850706
Ndufa7	4.2645	4.4977	0.542028	0.850749
Rhox8	2.93747	3.17061	0.830187	0.850782
Cox8a	7.24505	7.47815	0.68118	0.850805
Vmp1	3.52521	3.75829	0.639316	0.850821
Recql	2.80482	3.03764	0.553928	0.85097
Mpc1	3.59473	3.82721	0.692371	0.851174
Tmem134	4.9155	5.14778	0.589189	0.851289
1500011K16Rik	3.44945	3.68151	0.568678	0.851418
Ezh2	2.82671	3.05849	0.516763	0.85158
Ncbp3	3.16465	3.39642	0.351622	0.851587
Farsa	4.57298	4.80472	0.59691	0.851607
Aoc2	1.21967	1.4514	0.528821	0.851612
Acyp2	1.31631	1.54802	0.740877	0.851622
Raver1	4.70447	4.93618	0.632901	0.851623
Nfil3	3.57193	3.8034	0.727657	0.851766
Cenpx	4.19551	4.42686	0.528283	0.851835
Psmb4	6.96546	7.19661	0.651168	0.851954
Nupl2	0.809308	1.03985	0.614431	0.852316
Ggact	1.91504	2.14555	0.488218	0.852334
Drap1	6.79033	7.02083	0.570653	0.852339
Samd9l	5.38713	5.61756	0.52635	0.852382
Ttc7	5.28844	5.51858	0.605146	0.852554
Il20ra	1.1237	1.35379	0.711745	0.852584
Uprt	2.31964	2.54935	0.49079	0.852801
Kctd17	1.09221	1.32191	0.540107	0.852815
Med11	4.3351	4.56476	0.544922	0.852837
Rpl10a	8.09999	8.32961	0.609384	0.852858
Thap4	2.34284	2.57241	0.511876	0.852889
Taf1d	3.72073	3.95024	0.562502	0.852925
Psph	3.41532	3.64472	0.552663	0.852992
2410015M20Rik	4.81339	5.04277	0.611752	0.852997
Stt3b	4.13668	4.36597	0.604707	0.853055
Ccdc85b	2.71012	2.93936	0.693932	0.853083
Vapa	4.94935	5.17854	0.507503	0.853113
Psmd7	4.55356	4.78269	0.632076	0.853153
Paox	1.69666	1.92537	0.266237	0.853399
Tomm40l	2.38438	2.61289	0.630988	0.853514
Tarbp2	3.06178	3.29016	0.540304	0.853595
Ppp1r15a	6.29184	6.5202	0.821607	0.853608
Psmb7	5.69848	5.92678	0.662055	0.85364
Gm6981	1.05552	1.28377	0.892488	0.85367
Spout1	3.44532	3.67328	0.609168	0.853841
Ndufa2	5.87946	6.10733	0.564023	0.853893
Elp5	3.46339	3.69122	0.614882	0.853919
Letm1	3.30522	3.53299	0.599462	0.853959
Acap3	2.35744	2.58513	0.588686	0.854001
Commd3	4.82087	5.04848	0.590963	0.854048
Katnbl1	1.96091	2.18848	0.567924	0.854067
Rab5if	5.36704	5.59448	0.705665	0.854147
Psma1	5.56938	5.79676	0.607234	0.854185
Tex9	2.05355	2.28085	0.211485	0.85423
2900026A02Rik	3.99427	4.22142	0.548821	0.854319
Pigt	4.32817	4.55531	0.65513	0.854328
Tpgs1	3.81291	4.04003	0.529943	0.854339
Qdpr	4.22916	4.45598	0.710402	0.854517
Rhbdl1	1.30867	1.53544	0.568825	0.854547
Il10rb	5.74249	5.96919	0.618068	0.854588
Fam92a	2.27906	2.50567	0.354152	0.854644
Caprin1	4.92902	5.15562	0.675996	0.854647
Gemin6	1.17221	1.3985	0.171897	0.854834
B2m	10.6114	10.8374	0.627415	0.854981
Dhps	4.23284	4.45883	0.668798	0.855007
Wdr1	6.28996	6.51591	0.641286	0.855032
Topbp1	4.09867	4.32457	0.617213	0.855062
Mafg	2.38655	2.61236	0.491909	0.855112
Samd10	2.94	3.16571	0.694867	0.855173
Lypla2	6.00842	6.23411	0.666546	0.855186
Actl6a	4.21573	4.44137	0.538741	0.855217
Ifit2	2.41098	2.63658	0.573135	0.855238
Psmd1	4.16111	4.38625	0.623809	0.855509
Clic1	7.72217	7.94718	0.644403	0.855592
H2-M3	4.38347	4.60839	0.560058	0.855639
Kras	3.81003	4.03491	0.652733	0.855668
Cotl1	7.34875	7.5733	0.665085	0.85586
Flot1	4.69768	4.9221	0.689614	0.855937
Mrpl11	2.1516	2.37578	0.537753	0.856087
Acaa2	4.81282	5.03686	0.694707	0.856164
Fam96a	4.78895	5.01296	0.669203	0.856183
Snrpc	5.07631	5.3003	0.722331	0.856193
Ddx10	3.55291	3.77684	0.528528	0.856232
Dpy30	4.04764	4.27126	0.452441	0.856411
Ssr1	3.35595	3.57957	0.545323	0.856414
Dnajc2	4.33071	4.55426	0.609734	0.856452
Hdlbp	4.09367	4.31684	0.555082	0.856677
Nacc1	4.91003	5.13295	0.637616	0.856831
Ets2	1.76596	1.98875	0.608022	0.85691
Map7d1	4.69524	4.91778	0.585861	0.857051
Acy1	2.42541	2.64786	0.633041	0.857108
Lrrc58	1.96629	2.18852	0.454846	0.857239
Cyb561d2	2.24399	2.4659	0.681028	0.857429
Rpl34-ps1	8.92903	9.15092	0.67075	0.857441
Vps36	4.43551	4.65704	0.684199	0.85766
Exoc4	2.71467	2.93615	0.710512	0.857686
Srebf1	4.09223	4.31354	0.662515	0.857785
Atp5d	6.29876	6.52006	0.663169	0.857788
Polr2f	4.99854	5.21903	0.605257	0.858274
Uba1	5.99606	6.21624	0.652039	0.85846
Gm29683	1.91698	2.13711	0.877749	0.858487
Ppip5k2	3.17319	3.39313	0.592652	0.858598
Dus1l	4.0446	4.26448	0.672207	0.858637
Lgals9	5.48948	5.70931	0.710235	0.858668
Glrx	4.53113	4.75078	0.724553	0.858772
Tmed10	4.83581	5.05532	0.690125	0.858853
E330020D12Rik	2.61231	2.83181	0.92398	0.858864
Mrps18a	3.68776	3.90713	0.60345	0.858937
C230072F16Rik	2.35515	2.57447	0.92111	0.858969
Gm4737	2.74003	2.95909	0.720967	0.859123
Wdr82	4.98245	5.20142	0.675041	0.859182
Mphosph10	3.006	3.22494	0.67562	0.859196
Tcp1	5.31196	5.53076	0.687141	0.859284
Ndufs4	3.98802	4.20655	0.619709	0.85944
Cmpk1	4.97979	5.19827	0.661385	0.859475
Guk1	3.77252	3.99086	0.656555	0.859553
Heg1	0.926382	1.14468	0.523031	0.859579
Lat	5.725	5.94279	0.654929	0.859886
Ercc8	1.83385	2.05158	0.697073	0.859912
Cd163l1	0.972071	1.18973	0.424998	0.859958
Suclg1	4.93803	5.1555	0.65404	0.860073
2310033P09Rik	4.22184	4.4393	0.444481	0.860076
Dopey2	3.29386	3.51129	0.628805	0.860099
Cxcr2	2.31891	2.53633	0.844279	0.860103
Zap70	6.55948	6.7768	0.606981	0.860164
Slc35f2	1.35956	1.57687	0.713818	0.860167
Trim27	4.08226	4.29905	0.524129	0.860476
Acp1	2.58548	2.80212	0.565547	0.860564
Rbck1	5.43124	5.64778	0.653447	0.860631
Arl6ip4	4.73784	4.95431	0.632589	0.860664
Taf9	4.30904	4.52542	0.664565	0.860725
Rpl7l1	4.45574	4.67181	0.651862	0.860906
Selenoi	1.60728	1.82335	0.432926	0.860906
Tmem251	3.14221	3.3582	0.713836	0.860955
Coil	1.90432	2.1203	0.576082	0.860958
Slamf7	5.51123	5.72718	0.609769	0.860981
Ndufaf3	2.57519	2.79114	0.632511	0.860982
Zfp414	3.58081	3.79673	0.629029	0.861
Sh3glb2	4.02481	4.2407	0.677073	0.861019
Rassf1	4.41685	4.63268	0.733664	0.861046
Gtpbp6	4.05127	4.26678	0.598675	0.861246
Gm11127	5.92033	6.1357	0.331888	0.861326
Nasp	3.45381	3.66915	0.681125	0.86134
Zdhhc8	2.92248	3.13776	0.646593	0.861378
Ppp6r1	6.27029	6.48555	0.712689	0.861387
Arl1	4.68238	4.89744	0.680946	0.861508
Fem1a	3.10618	3.32115	0.650516	0.861562
Ptdss1	3.83161	4.0463	0.686424	0.86173
Tomm7	4.93329	5.14795	0.557986	0.86175
Prdx5	5.88144	6.09583	0.602162	0.861909
Psenen	5.93071	6.14509	0.662792	0.861913
Prim2	2.63338	2.84775	0.618885	0.861922
Eif1ad	3.66715	3.8815	0.618534	0.861929
Ddx1	3.93337	4.1477	0.64451	0.861945
Szrd1	4.51922	4.73343	0.683748	0.86202
Sf3b4	4.40056	4.61463	0.715775	0.862106
Zdhhc21	2.15851	2.37256	0.47325	0.862114
Pmpca	4.00044	4.21446	0.65155	0.862129
Sft2d1	4.89703	5.11099	0.654922	0.862166
D830005E20Rik	0.939918	1.15355	0.912912	0.862362
Ppp3cc	5.56597	5.77958	0.657178	0.862376
Mtap	2.8985	3.11208	0.733213	0.862395
Pycr2	4.10392	4.31744	0.637245	0.862428
Abtb2	2.29691	2.51035	0.674079	0.862477
Gt(ROSA)26Sor	2.26235	2.47556	0.461536	0.862612
E2f4	4.8931	5.10611	0.573143	0.862738
B3galnt2	2.61237	2.82529	0.615928	0.862788
Znhit2	3.42875	3.64163	0.609088	0.862812
Nmi	4.91493	5.1277	0.533147	0.862877
Ifih1	1.73452	1.94701	0.58274	0.863044
Txndc17	3.88429	4.09664	0.6344	0.863131
Btg3	2.76103	2.97319	0.688325	0.863243
Gbp7	4.52267	4.73482	0.557388	0.863245
Qpct	2.83772	3.04985	0.700783	0.863262
Mmadhc	4.15798	4.37	0.722628	0.863332
Abcf2	3.61065	3.82266	0.632495	0.863333
Syngr2	5.02262	5.23463	0.692899	0.863336
Sec13	4.87411	5.08606	0.671234	0.863369
Tpm4	6.42424	6.63594	0.698165	0.863521
Rbm8a	4.01733	4.22903	0.534124	0.863523
1700128F08Rik	1.42679	1.63832	0.911889	0.863616
Atf1	4.42401	4.63548	0.665639	0.863661
Smn1	3.53776	3.74904	0.296777	0.863772
Ifi47	6.52974	6.74088	0.640733	0.863849
Rpl36	8.94547	9.15637	0.655162	0.863996
Etfbkmt	2.15062	2.3615	0.715943	0.864013
Arf6	6.12974	6.34048	0.663921	0.864092
E130309D02Rik	3.62323	3.83396	0.689481	0.864097
9430038I01Rik	1.93515	2.1457	0.501359	0.864205
Riok2	2.9288	3.13905	0.411639	0.864383
Slc25a1	3.81483	4.02503	0.670304	0.864412
Atp10a	2.42004	2.63024	0.642215	0.864413
Ppia	8.93231	9.14251	0.731116	0.864415
Tmem198	1.76681	1.97678	0.606015	0.864558
Psmd13	5.15257	5.36206	0.658028	0.864842
Chmp4b	5.78629	5.99569	0.718359	0.864897
Msra	2.62173	2.83113	0.600677	0.864897
Lnpk	1.56818	1.7775	0.48897	0.864943
Svbp	3.9885	4.19779	0.648961	0.86496
Rtca	3.11773	3.32702	0.668753	0.864963
Ap1s3	3.38536	3.59444	0.0841645	0.865088
Dusp28	1.87542	2.08441	0.611793	0.865142
Ndufb5	4.70014	4.90909	0.644868	0.865168
Isg20l2	3.73764	3.94656	0.661649	0.865184
Irak1	4.42968	4.63843	0.598593	0.865289
Pop5	4.20392	4.41264	0.606999	0.8653
Nfu1	3.4574	3.6661	0.47046	0.865319
Nudt1	2.49577	2.70425	0.589138	0.865447
Zpr1	3.15815	3.36645	0.684922	0.865558
Gramd1b	4.2514	4.4596	0.596463	0.865616
Keap1	3.69049	3.89853	0.663016	0.865715
Ywhag	4.77232	4.98009	0.67624	0.865874
Lsm3	4.76161	4.96915	0.655865	0.866012
4930579G24Rik	2.33283	2.54032	0.467657	0.86604
Bloc1s1	5.56646	5.77373	0.688272	0.866175
Usp5	4.11096	4.31798	0.6731	0.866326
Rpl27	8.43686	8.64373	0.66066	0.866417
Ece1	3.13739	3.3442	0.60835	0.866454
Zswim7	1.50072	1.70743	0.722641	0.866511
Cfdp1	4.43382	4.64035	0.696655	0.866622
Acap1	6.93136	7.13787	0.568144	0.86663
Tln1	6.61479	6.82121	0.643908	0.866686
Myo6	3.70797	3.9143	0.535865	0.86674
Gramd4	3.95145	4.15775	0.692177	0.866757
Zcrb1	4.7736	4.97986	0.406739	0.866784
Ccdc58	2.15658	2.36281	0.667618	0.866797
Lgalsl	2.44515	2.65139	0.700539	0.866798
Srd5a3	3.37198	3.57817	0.712057	0.866828
Pdcd11	2.95478	3.16077	0.579426	0.866944
Polr1d	5.12828	5.33413	0.604573	0.867028
Strap	4.68392	4.88964	0.699707	0.867108
Rufy2	1.89032	2.09602	0.711361	0.867117
Dhrs4	2.43325	2.63883	0.656096	0.867185
Tpcn2	1.49729	1.70288	0.435658	0.867186
H2-Q9	6.11864	6.32388	0.678163	0.86739
Foxk1	2.90093	3.10614	0.6555	0.867413
Nme3	4.46851	4.67348	0.551993	0.867559
Mllt11	1.43164	1.63659	0.46921	0.867568
Dera	3.13101	3.33586	0.652508	0.867626
Nop14	3.08574	3.29049	0.626979	0.86769
H13	2.88696	3.09162	0.665671	0.867748
March2	3.2931	3.49765	0.683633	0.867807
Gadd45b	5.29705	5.50144	0.798753	0.867905
Poldip2	3.03045	3.23484	0.713758	0.86791
Eny2	3.0355	3.23985	0.618284	0.867929
Taf13	3.5677	3.77204	0.663762	0.867936
Hps6	2.28319	2.48738	0.596189	0.868027
Fxn	1.18973	1.3938	0.499387	0.868098
Hnrnpa3	4.97105	5.17499	0.661159	0.868178
2310039L15Rik	4.05912	4.26304	0.78848	0.868192
Cyp20a1	2.33758	2.54135	0.648894	0.868281
Acot7	6.14211	6.34577	0.625823	0.868345
Pepd	3.06595	3.2696	0.583149	0.868354
Tha1	2.16966	2.37326	0.727187	0.86838
Bckdk	3.34067	3.54417	0.511978	0.868437
Trabd	5.0697	5.27317	0.700689	0.868458
Slc35b2	3.85969	4.06275	0.680947	0.868707
Ndufs6	5.12545	5.32844	0.6635	0.868749
3000002C10Rik	1.11317	1.31614	0.693321	0.86876
Amd1	2.67356	2.87649	0.670543	0.86878
2610524H06Rik	3.29024	3.49308	0.563243	0.868843
Naa40	3.20209	3.40475	0.631454	0.868946
Rfc3	2.70604	2.9083	0.391945	0.869184
Ube2l6	3.12744	3.32965	0.504637	0.869219
Resf1	4.13178	4.33398	0.615124	0.869223
Mief2	1.85174	2.0537	0.634444	0.86937
Sod2	3.47997	3.68186	0.622894	0.869415
Ssrp1	5.61875	5.82054	0.711501	0.869468
Bsg	5.54179	5.74347	0.636063	0.869538
Thoc5	3.7764	3.97804	0.649184	0.869563
Magt1	3.56598	3.76754	0.630011	0.869607
Eif3g	5.93214	6.13358	0.68731	0.869681
Morf4l1-ps1	1.30107	1.50244	0.826507	0.869723
Msn	7.30201	7.50326	0.689847	0.869795
Slfn9	1.80402	2.00506	0.329908	0.869921
Ddx58	4.41909	4.6201	0.669624	0.869936
Ezr	6.39254	6.5935	0.680288	0.869971
Dpp3	4.4823	4.68315	0.68718	0.870043
Atp9a	2.78114	2.98192	0.685743	0.87008
Rbx1	4.62211	4.82283	0.478603	0.870117
Atp5h	7.34659	7.5473	0.705708	0.870124
Mettl21a	1.26155	1.46208	0.66874	0.870231
Rmdn3	2.92087	3.12132	0.634812	0.870281
Alg2	2.32812	2.5285	0.35765	0.870324
Nabp1	4.90371	5.10405	0.630842	0.87035
Pgam5	3.754	3.95428	0.559291	0.870386
B3gntl1	1.90319	2.10342	0.473621	0.87041
Gpr137b-ps	1.55617	1.75637	0.662491	0.870428
Tmem110	1.8297	2.0299	0.571264	0.870429
Eea1	2.50718	2.70736	0.626176	0.870443
U2af2	6.24173	6.44189	0.647848	0.870451
Cbx5	2.78675	2.98683	0.601966	0.870498
Top1mt	1.25182	1.4519	0.755784	0.870503
Gorasp2	4.10496	4.30492	0.683851	0.870573
Yif1a	3.1857	3.38556	0.702185	0.870636
Ddx51	2.02571	2.22557	0.636008	0.870638
Cuedc1	3.0121	3.21195	0.554543	0.870639
Vdac1	4.34081	4.54043	0.624071	0.870775
Ptpn6	6.35106	6.55047	0.632887	0.870904
Adh5	4.79588	4.99523	0.631032	0.870937
Pcyox1l	1.03414	1.2335	0.628193	0.87094
Cap1	7.71758	7.9168	0.718847	0.871021
5730409E04Rik	1.72224	1.92139	0.356332	0.871064
Srgn	7.45023	7.64905	0.6559	0.871262
Ncdn	3.14453	3.3433	0.721658	0.871291
Arsb	6.9746	7.17335	0.705807	0.871306
Ctu1	1.79682	1.99555	0.567499	0.871318
Manbal	3.56632	3.76498	0.677616	0.871358
Gm6644	5.45027	5.64887	0.712899	0.871396
Plekha1	3.75547	3.95392	0.631819	0.871491
Pcbp1	6.42143	6.61964	0.741364	0.871633
Rps17	8.61654	8.81474	0.628966	0.871636
Amfr	5.18065	5.37884	0.656033	0.871647
Nudt16l1	4.59969	4.79769	0.626531	0.87176
Parp9	3.51735	3.71482	0.64977	0.872075
Elac1	2.28551	2.4829	0.732729	0.872126
Mms22l	1.77743	1.9747	0.697977	0.872199
Rif1	2.64477	2.84198	0.58258	0.872237
Ddx19b	2.0059	2.20297	0.600024	0.872322
Leng9	2.31227	2.50924	0.740713	0.872379
Pdcd1lg2	2.19451	2.39139	0.64322	0.872432
Sf3b6	4.8649	5.06171	0.666611	0.872478
Tusc3	3.23101	3.42778	0.637088	0.872502
Zdhhc16	3.17299	3.36975	0.667444	0.87251
Ddx56	2.88027	3.07678	0.610873	0.872661
Cnih1	3.63434	3.83053	0.658795	0.87285
Tmed9	6.05637	6.25255	0.734275	0.872855
Impdh2	4.78316	4.97934	0.705987	0.872859
Ubfd1	2.61244	2.80851	0.587234	0.872926
Arpc5l	5.68765	5.88367	0.628006	0.872953
Mrpl42	4.36631	4.56226	0.746094	0.872997
Gemin5	2.12137	2.31722	0.661281	0.873062
Clec2d	6.41717	6.61293	0.715161	0.873112
Soat1	2.7306	2.92619	0.63588	0.873211
Uqcrb	5.64152	5.83694	0.546374	0.873321
Ptp4a3	4.28703	4.4818	0.74107	0.873711
Adcy3	2.31604	2.51077	0.695654	0.873741
Tmsb10	9.85268	10.0474	0.751549	0.873771
Trir	6.66287	6.85749	0.52605	0.873802
Gpn2	2.7608	2.95525	0.652559	0.87391
Atp5f1	5.87419	6.06832	0.690515	0.874098
Cops5	3.89591	4.09001	0.719398	0.874116
Ccl4	6.525	6.71902	0.798592	0.874163
Sept9	6.515	6.70896	0.70977	0.874202
Swsap1	1.75745	1.95126	0.535049	0.874291
Xrcc5	2.88376	3.07696	0.606585	0.874663
Cd226	6.73017	6.92325	0.66975	0.874738
[truncated: 7,370 more rows]

## Sheet: List UP
log2 RPKM > 1 in at least one condition; log2 FC > 0.736965594; p-value < 0.05
Gene Symbol	Tofacitinib	Vehicle	Max	pvalue	FC
Tcf7	5.75459	4.17415	5.75459	0.0348978	2.99061
Ikzf2	3.08162	2.20518	3.08162	0.0491412	1.83584
Bcl6	2.74833	0.941732	2.74833	0.00971022	3.49816
Slc27a6	2.14906	1.1867	2.14906	0.0432113	1.9485
Abca1	1.89333	0.409856	1.89333	0.0297641	2.79622
Bach2	1.84935	0.872512	1.84935	0.00586339	1.96815
Rhod	1.77586	0.105281	1.77586	0.0267892	3.18343
Rubcnl	1.68935	0.711781	1.68935	0.0428861	1.96914
Hist1h4n	1.65274	0.158072	1.65274	0.0029987	2.81799
Dzank1	1.56453	0.672805	1.56453	0.0300361	1.8554
Cd24a	1.49818	-2.1526	1.49818	0.0284414	12.5601
Igf1r	1.36974	-0.0798617	1.36974	0.000630141	2.73133

## Sheet: List DOWN
log2 RPKM > 1 in at least one condition; log2 FC < -0.736965594; p-value < 0.05
Gene Symbol	Tofacitinib	Vehicle	Max	pvalue	FC
F2rl2	1.46232	4.13554	4.13554	0.00594299	0.156777
Gzmb	6.07365	8.65543	8.65543	0.0326632	0.167035
Bcl2	3.47804	5.90709	5.90709	0.0180246	0.185687
Bspry	1.0888	3.43729	3.43729	0.016118	0.196351
Serpina3f	2.1529	4.36761	4.36761	0.0021472	0.215431
Cdh17	-1.08029	1.11513	1.11513	0.0156318	0.218329
Pim2	3.90823	6.04109	6.04109	0.00676939	0.228005
Ccnb2	-0.555657	1.48555	1.48555	0.00370931	0.24296
Tasp1	2.54439	4.55309	4.55309	0.021029	0.248497
Cdca7	0.396265	2.38833	2.38833	0.00633757	0.251379
Cdk6	-0.157837	1.8122	1.8122	0.00747309	0.255246
Serpina3g	5.52572	7.4887	7.4887	0.0102024	0.256498
Pclaf	0.552339	2.51145	2.51145	0.000698822	0.257187
Cish	3.23438	5.17321	5.17321	0.0320987	0.260827
Ifi44	-0.752404	1.18052	1.18052	0.0168266	0.261897
Ifi27l2a	0.60196	2.53022	2.53022	0.000981259	0.262745
Slc7a5	0.916756	2.84221	2.84221	0.0208947	0.263257
Hbegf	0.599442	2.5096	2.5096	0.0430538	0.266063
Capg	3.36846	5.26554	5.26554	0.0131171	0.268487
Srm	2.01109	3.90692	3.90692	0.0124294	0.268719
Usp18	-0.310295	1.57613	1.57613	0.00504757	0.270477
E2f1	0.799172	2.65223	2.65223	0.0263315	0.276805
Chek1	-0.814866	1.0211	1.0211	0.0387403	0.280103
Ctps	0.639954	2.4224	2.4224	0.0249567	0.290691
Rrm2	1.36824	3.09677	3.09677	0.0107795	0.301759
Tmem163	0.250896	1.94357	1.94357	0.0327373	0.309354
Stmn1	3.85054	5.50024	5.50024	0.0106318	0.318707
Cxcl10	0.0117837	1.63802	1.63802	0.0361977	0.323932
Nek6	0.29028	1.90286	1.90286	0.0167124	0.327013
Fignl1	-0.379451	1.22625	1.22625	0.00715373	0.328577
Slc16a10	1.13262	2.72874	2.72874	0.00769077	0.330766
Apex1	1.64107	3.23626	3.23626	0.0269458	0.330979
Prr5l	-0.441852	1.14789	1.14789	0.0104677	0.33223
Rrp12	0.537875	2.10016	2.10016	0.0203861	0.338615
Mettl1	0.799504	2.35701	2.35701	0.0235976	0.339738
Tsr1	2.24898	3.79676	3.79676	0.0436731	0.342036
Top2a	1.2876	2.83001	2.83001	0.00982677	0.343313
Ccna2	-0.493653	1.04487	1.04487	0.0193663	0.344238
Ccnd2	4.94502	6.47719	6.47719	0.013107	0.345758
1700017B05Rik	1.01303	2.53676	2.53676	0.0344086	0.347784
Ifit1	0.163929	1.68491	1.68491	0.0235626	0.348448
Mx1	-0.510299	1.00302	1.00302	0.00426163	0.350305
Mki67	1.02653	2.53228	2.53228	0.0458591	0.352145
Kif11	-0.208957	1.28299	1.28299	0.0198786	0.355532
Ppp1r14b	3.8619	5.34731	5.34731	0.0318534	0.357147
Klrb1a	4.57024	6.04598	6.04598	0.0169712	0.35955
Fabp5	0.0759235	1.54964	1.54964	0.0360113	0.360052
Rexo5	1.62796	3.0821	3.0821	0.0272771	0.364972
Rnf157	0.0853654	1.51227	1.51227	0.0386071	0.371927
Trmt61a	1.04591	2.46089	2.46089	0.0289386	0.375017
Ppa1	2.45409	3.83312	3.83312	0.0384207	0.384478
Mlkl	0.0691561	1.42803	1.42803	0.0276564	0.389886
Timm9	1.28515	2.61427	2.61427	0.0320825	0.398008
Nme1	4.73077	6.03982	6.03982	0.0472175	0.403587
Pusl1	0.851691	2.12758	2.12758	0.0301111	0.412971
Cks1b	1.83378	3.10881	3.10881	0.00961071	0.413216
Isg20	0.169609	1.43745	1.43745	0.0131575	0.415281
Epcam	0.769362	2.03494	2.03494	0.0020467	0.415932
Spred1	0.0411068	1.28058	1.28058	0.0354941	0.423528
Ipo4	1.25502	2.47065	2.47065	0.0261133	0.430584
Nle1	1.89807	3.10658	3.10658	0.0268286	0.432714
Bysl	1.63474	2.8321	2.8321	0.0387738	0.436073
Pole	0.344446	1.53448	1.53448	0.0231911	0.438292
Wdr4	1.05288	2.23819	2.23819	0.038399	0.439731
Mrto4	2.708	3.88555	3.88555	0.0245252	0.442103
E2f3	0.27174	1.44521	1.44521	0.0233109	0.443355
Isg15	3.30805	4.48128	4.48128	0.033505	0.44343
Otos	0.288545	1.45785	1.45785	0.0359398	0.444637
Pus1	2.71485	3.88022	3.88022	0.0377461	0.44585
Rad51	0.954919	2.10138	2.10138	0.0438827	0.451733
Ifit3	0.584862	1.69256	1.69256	0.00433795	0.464033
Rasd2	1.01358	2.11492	2.11492	0.00762668	0.466085
Bcl2l1	3.55846	4.62075	4.62075	0.0471094	0.478872
Gbp10	2.10045	3.15297	3.15297	0.00541109	0.482124
Cdca3	0.00214824	1.04797	1.04797	0.0436544	0.484368
Chaf1a	1.14635	2.18541	2.18541	0.0484167	0.486646
Aen	1.18832	2.20972	2.20972	0.0409075	0.492641
Ung	1.6735	2.6902	2.6902	0.0316736	0.494245
Pik3r5	3.70031	4.68448	4.68448	0.0470486	0.505519
Rgl1	0.480485	1.4612	1.4612	0.0255573	0.506728
Pus7	0.291148	1.27153	1.27153	0.0336994	0.506844
Gadd45g	4.59468	5.53703	5.53703	0.0455387	0.520384
Pdcd1	1.84434	2.78442	2.78442	0.00843318	0.521204
Tnfrsf9	3.62443	4.54288	4.54288	0.0106212	0.52908
Ears2	0.145481	1.04861	1.04861	0.0155909	0.534725
Polr1b	1.7513	2.60664	2.60664	0.0372486	0.552736
Wwc2	0.289843	1.13493	1.13493	0.048545	0.556679
Fdx1l	2.50182	3.31422	3.31422	0.0352179	0.569437
Dhx58	1.41175	2.21518	2.21518	0.0381543	0.572984
Chst2	1.06243	1.85128	1.85128	0.0273774	0.578804
Pde11a	0.985084	1.72932	1.72932	0.00794756	0.596984
